# Supplementary material for: Prevalence and practice for rare diseases in primary care: a national cross-sectional study in the USA
Source: PubMed Central journal article supplement — BMJ Open. 2019 Apr 1;9(4):e027248. doi: 10.1136/bmjopen-2018-027248 (PMC6500220; doi:10.1136/bmjopen-2018-027248), 2019-04-01
Supplement: bmjopen-2018-027248.draft_revisions.pdf [file bmjopen-2018-027248.draft_revisions.pdf]

# BMJ Open

BMJ Open is committed to open peer review. As part of this commitment we make the peer review history of every article we publish publicly available.

When an article is published we post the peer reviewers' comments and the authors' responses online. We also post the versions of the paper that were used during peer review. These are the versions that the peer review comments apply to.

The versions of the paper that follow are the versions that were submitted during the peer review process. They are not the versions of record or the final published versions. They should not be cited or distributed as the published version of this manuscript.

BMJ Open is an open access journal and the full, final, typeset and author-corrected version of record of the manuscript is available on our site with no access controls, subscription charges or pay-per-view fees (<http://bmjopen.bmj.com>).

If you have any questions on BMJ Open's open peer review process please email [info.bmjopen@bmj.com](mailto:info.bmjopen@bmj.com)

# BMJ Open

## Rare diseases in Primary Care: Prevalence and Practice

|                               |                                                                                                                                                                                                                                                                                                                                                                        |
|-------------------------------|------------------------------------------------------------------------------------------------------------------------------------------------------------------------------------------------------------------------------------------------------------------------------------------------------------------------------------------------------------------------|
| Journal:                      | <i>BMJ Open</i>                                                                                                                                                                                                                                                                                                                                                        |
| Manuscript ID                 | bmjopen-2018-027248                                                                                                                                                                                                                                                                                                                                                    |
| Article Type:                 | Research                                                                                                                                                                                                                                                                                                                                                               |
| Date Submitted by the Author: | 15-Oct-2018                                                                                                                                                                                                                                                                                                                                                            |
| Complete List of Authors:     | Jo, Ara; University of Florida, Health Services Research, Management and Policy;<br>Larson, Samantha; University of Florida<br>Carek, Peter; University of Florida<br>Peabody, Michael R; American Board of Family Medicine,<br>Peterson, Lars E.; Amer Board Family Med<br>Mainous III, Arch; University of Florida, Health Services Research, Management, and Policy |
| Keywords:                     | PRIMARY CARE, PREVENTIVE MEDICINE, Quality in health care < HEALTH SERVICES ADMINISTRATION & MANAGEMENT                                                                                                                                                                                                                                                                |
|                               |                                                                                                                                                                                                                                                                                                                                                                        |

SCHOLARONE™  
Manuscripts

## Rare diseases in Primary Care: Prevalence and Practice

Ara Jo, PhD <sup>1</sup>, Samantha Larson, MPH <sup>1</sup>, Peter J. Carek, MD, MS <sup>2</sup>, Michael R. Peabody, PhD <sup>3</sup>, Lars E. Peterson, MD, PhD <sup>3,4</sup>, Arch G. Mainous III, PhD <sup>1,2</sup>

1. Department of Health Services Research, Management and Policy, University of Florida

2. Department of Community Health and Family Medicine, University of Florida

3. The American Board of Family Medicine, Lexington, KY

4. Department of Family and Community Medicine, University of Kentucky

Corresponding Author:

Ara Jo, PhD

Department of Health Services Research, Management and Policy

University of Florida

Health Sciences Center, PO Box 100195

Gainesville, FL 32610 USA

Phone: 352-273-6539

Fax: 352-273-6075

[ara13j@ufl.edu](mailto:ara13j@ufl.edu)

Word count of the abstract: 289

Word count of the text: 1,535

Tables: 3

**Keywords:** Rare disease, primary care, scope of practice

## Abstract

**Objectives:** There are more than 7,000 rare diseases in the US and they are prevalent in 8% of the population. Due to life-threatening risk and limited therapies, early detection and treatment are critical. The purpose of this study was to explore characteristics of visits for patients with rare diseases seen by primary care physicians (PCPs).

**Design:** The study used a cross sectional study using a national representative dataset, the National Ambulatory Medical Care Survey for the years 2012-2014.

**Setting:** Primary care setting

**Participants:** Visits to PCPs (n= 22,306 representing 354,507,772 office visits to PCPs).

**Primary Outcome Measures:** Prevalence of rare diseases in visits of PCPs was the primary outcome. Bivariate analyses and logistic regression analyses were used to compare patients with rare diseases and those without rare diseases and examined characteristics of PCP visits for rare diseases and practice pattern.

**Results:** Among outpatient visits to PCPs, rare diseases account for 1.6% of the visits. The majority of patients with rare diseases were established patients (93.0%) and almost half (49.0%) were enrolled in public insurance programs. The time spent in visits for rare diseases (22.4 minutes) and visits for more common diseases (21.3 minutes) was not significantly different (p=.09). In an adjusted model controlling for patient characteristics (age, sex, types of insurance, reason for this visit, total number of chronic disease, having a rare disease and established or new patient), patients with

1  
2  
3 rare diseases were 34% less likely to be referred to another provider (OR 0.66, 95% CI,  
4  
5 0.44-0.99).  
6  
7

8 **Conclusions:** Visits for rare diseases are uncommon in primary care practice. Future  
9  
10 research may help to explain whether this low level of management of rare diseases in  
11  
12 primary care practice is consistent with a goal of a broad scope of care.  
13  
14  
15

### 16 17 18 19 **Strengths and limitations of this study** 20 21

- 22 • This study is the first research to investigate characteristics of patients with rare  
23 diseases seen in primary care practice and the association between physician  
24 referral and rare disease diagnosis.  
25  
26
- 27 • The study used population-based national representative data allowing for  
28 generalizability.  
29  
30
- 31 • Primary care physicians may play a vital role in providing continuous care and  
32 managing patients with rare diseases effectively.  
33  
34
- 35 • The study is limited to the actions recorded in one visit due to study design.  
36  
37
- 38 • The study was unable to determine if that referral is for a consult or part of a  
39 shared care relationship between primary care and specialty care  
40  
41  
42  
43  
44  
45  
46  
47  
48  
49  
50  
51  
52  
53  
54  
55  
56  
57  
58  
59  
60

## Introduction

Primary Care Physicians (PCPs) are trained to provide care for a broad scope of conditions within their patient population. When PCPs maintain a broad scope of practice this safeguards access and quality of care for the general population. Some of these conditions are managed directly by the PCP and with others the PCP coordinates the care for the patient. One recent study indicated that in one year, family physicians typically manage about 1,700 diagnoses in office visits, with 100 diagnoses managed frequently.(1)

In addition to common, high prevalence diseases like diabetes, hypertension and arthritis, a substantial proportion of the general patient population, has a rare disease, or diseases. As of 2017, the National Institute of Health (NIH) Genetic and Rare Disease Information Center (GARD) had identified 7,000 rare diseases, affecting approximately 25-30 million people in the US population. (2) Rare diseases are categorized as life-threatening, with only few limited effective therapies available. In addition to the emotional and physical burden associated with diagnosis, patients with a rare disease often face financial burden due to the significant cost associated with drugs and therapies. As such, early detection and treatment are critical. For example, in one study, more than half of patients with rare diseases being seen at a PCP practice had been diagnosed with rare diseases at a PCP practice.(3)

However, to date there have been few studies investigating the role of PCPs in the management of patients with rare diseases. The purpose of this study was to

1  
2  
3 examine in a nationally representative sample of visits, the prevalence of rare diseases  
4  
5 cared for in primary care practice as well as characteristics of patients and providers.  
6  
7

## 8 **Methods**

9  
10  
11 This study used the National Ambulatory Medical Care Survey (NAMCS), a national  
12  
13 representative dataset, for the years 2012-2014. The NAMCS is a national probability  
14  
15 sample survey of ambulatory medical care visits to office-based physicians that allows  
16  
17 for national estimates regarding medical care in the US.(3) NAMCS data is collected  
18  
19 annually by the National Center for Health Statistics (NCHS). The sample frame for  
20  
21 NAMCS data in the years 2012-2014 was composed of PCPs who specialize in primary  
22  
23 care (e.g., General and Family Practice, Internal medicine and Pediatrics), and who  
24  
25 identified themselves as the primary care physician (PCP) of the patient.(4) This list  
26  
27 conforms to the definition used by the NAMCS to categorize primary care. The  
28  
29 unweighted sample size was 22,306 representing 354,507,772 office visits to PCPs in  
30  
31 the US from 2012-2014.  
32  
33  
34  
35  
36  
37

### 38 **Rare disease**

39  
40 A rare disease is defined as a case that affects fewer than 200,000 people.(2) For this  
41  
42 study, diagnoses were identified as a rare disease using the list provided by the GARD  
43  
44 Information Center.(2)  
45  
46

### 47 **Independent Variables**

48  
49 Demographics of patients seen by PCPs, such as age, gender and race/ethnicity, were  
50  
51 used. Gender and race/ethnicity (i.e., Non-Hispanic White, Non-Hispanic Black,  
52  
53 Hispanics and Others) were considered categorical variables whereas age was used as  
54  
55  
56  
57

1  
2  
3 a continuous variable. In addition, their form of health insurance, major reason for the  
4 visit, and total number of diagnosed chronic diseases were included as categorical  
5 variables. Health insurance was stratified into four categories: private insurance, public  
6 insurance such as Medicaid and Medicare, self-pay, and others. Major reason for the  
7 visit was also categorized into four groups: new problems, chronic problems, pre- or  
8 post-surgery care and preventive care.  
9

10  
11  
12  
13  
14  
15  
16  
17  
18  
19  
20  
21  
22  
23  
24  
25  
26  
27  
28  
29  
30  
31  
32  
33  
34  
35  
36  
37  
38  
39  
40  
41  
42  
43  
44  
45  
46  
47  
48  
49  
50  
51  
52  
53  
54  
55  
56  
57  
58  
59  
60

Providers characteristics including practice location (i.e., urban or rural), referral to other  
providers (i.e., yes or no) were examined. Time spent with providers in primary care  
setting was compared between patients with rare diseases and those without rare  
diseases.

### Statistical Analysis

To account for the complex survey design used in the NAMCS, a weighted variable was  
used to consider survey design effect. This allows for us to provide population estimates  
of United States ambulatory health care utilization.<sup>(3)</sup> The prevalence of rare disease  
seen in the primary care setting was estimated. Chi-square tests were used to compare  
characteristics of PCPs who care for rare diseases against those who do not. Logistic  
regression was also employed to examine the association between PCP referral to  
other providers and patient diagnosis of a rare disease. All analyses were conducted in  
SAS version 9.4 (Cary, NC). This study was approved as exempt by the Institutional  
Review Board at the University of Florida.

### Patient and Public Involvement

Patients and/or public were not involved in this study.



## Results

The final sample was 22,306 representing 354,507,772 office visits to PCPs in the US from 2012-2014. A total of 1,508 PCPs participated to submit data for sample patient visits. Of the total patient visits to a PCP, a rare disease was noted in 1.6% of those visits. PCPs cared for 177 different rare diseases. Patients with rare diseases were significantly older than those without rare diseases (age difference = 8.3 years,  $p < .01$ ), while no significant differences were found in the distribution of sex and race/ethnicity (Table 1). The majority of patients with rare diseases were established patients (93.0%), having been seen by the PCP more than one time, and almost half (49.3%) were enrolled in private insurance programs. Of the visits for patients diagnosed with a rare disease, 39.0% visited their PCPs with a comorbid chronic problem. In addition, they had a higher total number of chronic diseases compared to patients without rare diseases (Table 1).

Of visits by patients with rare disease, 14.3% were referred to other providers (Table 2). While PCPs spent slightly more time with their patients who had rare diseases (22.4 min), compared to patients without rare diseases (21.3 min), it was not significantly different (Table 2). The majority of visits for patients with rare diseases and more common diseases who were seen by PCPs were located in urban areas. PCPs practicing in rural areas (7.6%) were not significantly less likely than PCPs practicing in urban areas (16.8%;  $p = .06$ ) to refer patients with rare diseases to another physician. In a bivariate analysis, care for rare disease was also not associated with rurality ( $p = .32$ ) (Table 2).

1  
2  
3 In an unadjusted regression model, patients with rare diseases were 41% less likely to  
4 be referred to other providers than those without rare diseases. After controlling for  
5  
6  
7  
8  
9  
10  
11  
12  
13  
14  
15  
16  
17  
18  
19  
20  
21  
22  
23  
24  
25  
26  
27  
28  
29  
30  
31  
32  
33  
34  
35  
36  
37  
38  
39  
40  
41  
42  
43  
44  
45  
46  
47  
48  
49  
50  
51  
52  
53  
54  
55  
56  
57  
58  
59  
60

In an unadjusted regression model, patients with rare diseases were 41% less likely to be referred to other providers than those without rare diseases. After controlling for covariates, such as patients characteristics (i.e., age, sex, race/ethnicity, types of insurance, major reason for this visit, total number of chronic disease, having a rare disease and established or new patient), patients with rare diseases were 64% less likely to be referred to another provider (Table 3).

## Discussion

This study found that few patients with a rare disease were identified as being managed in primary care practice. Patients with rare diseases show significantly different characteristics compared to those without a rare disease diagnosis. Not surprisingly, visits in primary care for patients with rare diseases are more likely than patients without rare diseases to lead to referral to another provider. To our knowledge, this is the first study to investigate characteristics of patients with rare diseases seen in primary care practice and the association between physician referral and rare disease diagnosis.

Much of medical practice and the corresponding comfort in diagnosing and treating conditions is affected by the frequency of occurrence of the condition and pattern recognition. Rare diseases are by their very nature uncommon and thus PCPs may not always feel comfortable with the nuances of treatment and potential complications for a disease that they encounter very infrequently. According to the National Academy of Medicine, since rare diseases tend to accompany multiple common conditions, it disrupts a clinician's ability to recognize clues of rare diseases.<sup>(7)</sup> In many of these cases PCPs need more than a consult from a specialist, especially when the primary

1  
2  
3 care team does not have the specialized medical knowledge. Receiving all of their care  
4 from specialists may not be the best situation for the patient. Patients with rare diseases  
5 need to be managed in primary care or at least have shared care between primary care  
6 and specialists in complementary roles to provide a more effective management of  
7 these complex patients.  
8  
9  
10  
11  
12  
13

14  
15 There are some limitations to this study. First, due to the design of the NAMCS we are  
16 limited to the actions recorded in that one visit. The design does allow us to have an  
17 understanding of the types of patients seen in primary care but it is not data on a cohort  
18 of patients. Thus, we do not know what sort of care may have transpired between the  
19 patient and the physician in previous visits. Second, we are able to see if patients are  
20 referred in that one visit, we are unable to determine if that referral is for a consult or  
21 part of a shared care relationship between primary care and specialty care.  
22  
23  
24  
25  
26  
27  
28  
29  
30  
31

## 32 Conclusion

33  
34  
35 This study identified characteristics of patients with rare diseases who are seen in  
36 primary care practice and the delivery patterns of PCPs managing patients with rare  
37 diseases. Findings from this study suggest that PCPs must possess a broad scope of  
38 practice in order to deliver comprehensive, high-quality care. A better understanding of  
39 the overall management of patients with rare diseases managed solely outside of  
40 primary care would help to improve the care for these patients.  
41  
42  
43  
44  
45  
46  
47  
48  
49  
50  
51  
52  
53  
54  
55  
56  
57  
58  
59  
60

## Acknowledgements

### Contributors:

Ara Jo, PhD led the entire research as the first and corresponding author from writing the manuscript, analyzing the data and interpretation.

Samantha Larson, MPH, analyzed the data and contributed to writing the manuscript.

Peter J. Carek, MD, MS contributed to writing the manuscript.

Michael R. Peabody, PhD, contributed to writing the manuscript.

Lars E. Peterson, MD, PhD, contributed to writing the manuscript.

Arch G. Mainous III, PhD, contributed to writing the manuscript and guided the direction of the study.

Conflict of Interest: Drs. Peterson and Peabody are employees of the American Board of Family Medicine. No other authors have no declaration of conflict of interests.

Funding Statement: This work was supported by a grant from the American Board of Family Medicine Foundation.

Ethics approval: This study was approved as exempt by the Institutional Review Board at the University of Florida.

1  
2  
3  
4  
5  
6  
7  
8  
9  
10  
11  
12  
13  
14  
15  
16  
17  
18  
19  
20  
21  
22  
23  
24  
25  
26  
27  
28  
29  
30  
31  
32  
33  
34  
35  
36  
37  
38  
39  
40  
41  
42  
43  
44  
45  
46  
47  
48  
49  
50  
51  
52  
53  
54  
55  
56  
57  
58  
59  
60

Data sharing statement: Data are available through the National Ambulatory Medical  
Care Survey access from  
[https://www.cdc.gov/nchs/ahcd/datasets\\_documentation\\_related.htm](https://www.cdc.gov/nchs/ahcd/datasets_documentation_related.htm).

For peer review only

## References

1. Peabody MR, O'Neill TR, Stelter KL, Puffer JC. Frequency and Criticality of Diagnoses in Family Medicine Practices: From the National Ambulatory Medical Care Survey (NAMCS). *The Journal of the American Board of Family Medicine*. 2018;31(1):126-38.
2. GARD. FAQs About Rare Diseases: National Center for Advancing Translational Sciences; 11/30/2017 [Available from: <https://rarediseases.info.nih.gov/diseases/pages/31/faqs-about-rare-diseases>].
3. Phillips WR. Zebras on the commons: rare conditions in family practice. *The Journal of the American Board of Family Practice*. 2004;17(4):283-6.
4. NCHS. NAMCS Scope and Sample Design: Centers for Disease Control and Prevention; 11/6/2015 [Available from: [https://www.cdc.gov/nchs/ahcd/ahcd\\_scope.htm](https://www.cdc.gov/nchs/ahcd/ahcd_scope.htm)].
5. NHCS. 2014 NAMCS micro-data file documentation. Centers for Disease Control and Prevention; 2014.
6. Genes G. RARE Diseases: Facts and Statistics-Statistics and Figures on Prevalence of Genetic and Rare Diseases [Available from: <https://globalgenes.org/rare-diseases-facts-statistics/>].
7. Boat TF, Field MJ. Rare diseases and orphan products: Accelerating research and development: National Academies Press; 2011.

Table 1. Characteristics of Patients with Rare Diseases in Primary Care, NAMCS 2012-2014 (unweighted N= 22,306, weighted N= 354,507,772)

|                                    | Patients with rare diseases (%) | Patients without rare diseases (%) | p-value |
|------------------------------------|---------------------------------|------------------------------------|---------|
| Unweighted Sample Size             | 363                             | 21,943                             |         |
| Weighted Sample Size               | 5,581,791                       | 348,925,981                        |         |
| Age (year-old) **                  | 47.7                            | 39.4                               | <0.001  |
| Sex                                |                                 |                                    |         |
| Female                             | 56.4                            | 53.8                               | 0.44    |
| Race                               |                                 |                                    |         |
| Non-Hispanic White                 | 75.0                            | 70.6                               | 0.54    |
| Non-Hispanic Black                 | 8.6                             | 10.1                               |         |
| Hispanics                          | 11.7                            | 14.3                               |         |
| Others                             | 4.7                             | 5.0                                |         |
| Insurance Types                    |                                 |                                    |         |
| Private Insurance                  | 49.3                            | 54.6                               | 0.15    |
| Public Insurance                   | 47.3                            | 40.0                               |         |
| Self-pay                           | 1.8                             | 3.5                                |         |
| Other                              | 1.5                             | 1.9                                |         |
| Major reasons for this visit**     |                                 |                                    |         |
| New Problems                       | 33.7                            | 42.6                               | 0.002   |
| Chronic Problems                   | 39.0                            | 28.7                               |         |
| Pre-/Post-Surgery                  | 27.3                            | 28.7                               |         |
| Preventive Care                    | 0.0                             | 0.0                                |         |
| Total Number of Chronic Diseases** | 1.3                             | 1.0                                | 0.001   |

\*\* statistical significant level at .05

Table 2. Practice Characteristics of Primary Care Physicians who Care for Patients with Rare Diseases using NAMCS, 2012-2014

|                                 | Patients with rare diseases | Patients without rare diseases | p-value |
|---------------------------------|-----------------------------|--------------------------------|---------|
| Practicing Area                 |                             |                                |         |
| Urban                           | 84.5                        | 86.4                           | 0.32    |
| Rural                           | 15.5                        | 13.6                           |         |
| Referral to Other Providers**   |                             |                                |         |
| Yes                             | 14.3                        | 9.0                            | 0.01    |
| No                              | 85.7                        | 91.0                           |         |
| Time Spent with Providers (min) | 22.4                        | 21.3                           | 0.09    |

\*\* statistical significant level at .05



Table 3. Odds Ratios of Referral Using Unadjusted and Adjusted Logistic Regression Analyses using NAMCS, 2012-2014

|                           | Unadjusted OR (95% CI) | Adjusted OR (95% CI) |
|---------------------------|------------------------|----------------------|
| Not having a rare disease | Reference              | Reference            |
| Having a rare disease     | 0.59 (0.40-0.87)**     | 0.66 (0.44-0.99)**   |

\*Controlled for age, gender, race/ethnicity, types of insurance, major reason for this visit, total number of chronic disease, having a rare disease and established vs. new patient.

\*\* statistical significant level at .05

For peer review only

## STROBE Statement—checklist of items that should be included in reports of observational studies

|                           | Item No | Recommendation                                                                                                                                                                                                                                                                                                                                                                                                                                                         | Page |
|---------------------------|---------|------------------------------------------------------------------------------------------------------------------------------------------------------------------------------------------------------------------------------------------------------------------------------------------------------------------------------------------------------------------------------------------------------------------------------------------------------------------------|------|
| <b>Title and abstract</b> | 1       | (a) Indicate the study's design with a commonly used term in the title or the abstract                                                                                                                                                                                                                                                                                                                                                                                 | 1    |
|                           |         | (b) Provide in the abstract an informative and balanced summary of what was done and what was found                                                                                                                                                                                                                                                                                                                                                                    | 2-3  |
| <b>Introduction</b>       |         |                                                                                                                                                                                                                                                                                                                                                                                                                                                                        |      |
| Background/rationale      | 2       | Explain the scientific background and rationale for the investigation being reported                                                                                                                                                                                                                                                                                                                                                                                   | 4-5  |
| Objectives                | 3       | State specific objectives, including any prespecified hypotheses                                                                                                                                                                                                                                                                                                                                                                                                       | 4-5  |
| <b>Methods</b>            |         |                                                                                                                                                                                                                                                                                                                                                                                                                                                                        |      |
| Study design              | 4       | Present key elements of study design early in the paper                                                                                                                                                                                                                                                                                                                                                                                                                | 5    |
| Setting                   | 5       | Describe the setting, locations, and relevant dates, including periods of recruitment, exposure, follow-up, and data collection                                                                                                                                                                                                                                                                                                                                        | n/a  |
| Participants              | 6       | (a) <i>Cohort study</i> —Give the eligibility criteria, and the sources and methods of selection of participants. Describe methods of follow-up<br><i>Case-control study</i> —Give the eligibility criteria, and the sources and methods of case ascertainment and control selection. Give the rationale for the choice of cases and controls<br><i>Cross-sectional study</i> —Give the eligibility criteria, and the sources and methods of selection of participants | 5    |
|                           |         | (b) <i>Cohort study</i> —For matched studies, give matching criteria and number of exposed and unexposed<br><i>Case-control study</i> —For matched studies, give matching criteria and the number of controls per case                                                                                                                                                                                                                                                 | n/a  |
| Variables                 | 7       | Clearly define all outcomes, exposures, predictors, potential confounders, and effect modifiers. Give diagnostic criteria, if applicable                                                                                                                                                                                                                                                                                                                               | 5-6  |
| Data sources/measurement  | 8*      | For each variable of interest, give sources of data and details of methods of assessment (measurement). Describe comparability of assessment methods if there is more than one group                                                                                                                                                                                                                                                                                   | 5-6  |
| Bias                      | 9       | Describe any efforts to address potential sources of bias                                                                                                                                                                                                                                                                                                                                                                                                              | n/a  |
| Study size                | 10      | Explain how the study size was arrived at                                                                                                                                                                                                                                                                                                                                                                                                                              | 5    |
| Quantitative variables    | 11      | Explain how quantitative variables were handled in the analyses. If applicable, describe which groupings were chosen and why                                                                                                                                                                                                                                                                                                                                           | n/a  |
| Statistical methods       | 12      | (a) Describe all statistical methods, including those used to control for confounding                                                                                                                                                                                                                                                                                                                                                                                  | 6    |
|                           |         | (b) Describe any methods used to examine subgroups and interactions                                                                                                                                                                                                                                                                                                                                                                                                    | 6    |
|                           |         | (c) Explain how missing data were addressed                                                                                                                                                                                                                                                                                                                                                                                                                            | n/a  |
|                           |         | (d) <i>Cohort study</i> —If applicable, explain how loss to follow-up was addressed<br><i>Case-control study</i> —If applicable, explain how matching of cases and controls was addressed<br><i>Cross-sectional study</i> —If applicable, describe analytical methods taking account of sampling strategy                                                                                                                                                              | 5-6  |
|                           |         | (e) Describe any sensitivity analyses                                                                                                                                                                                                                                                                                                                                                                                                                                  |      |

| <b>Results</b>           |     |                                                                                                                                                                                                              | <b>Page</b> |
|--------------------------|-----|--------------------------------------------------------------------------------------------------------------------------------------------------------------------------------------------------------------|-------------|
| Participants             | 13* | (a) Report numbers of individuals at each stage of study—eg numbers potentially eligible, examined for eligibility, confirmed eligible, included in the study, completing follow-up, and analysed            | n/a         |
|                          |     | (b) Give reasons for non-participation at each stage                                                                                                                                                         | n/a         |
|                          |     | (c) Consider use of a flow diagram                                                                                                                                                                           | n/a         |
| Descriptive data         | 14* | (a) Give characteristics of study participants (eg demographic, clinical, social) and information on exposures and potential confounders                                                                     | 7           |
|                          |     | (b) Indicate number of participants with missing data for each variable of interest                                                                                                                          | n/a         |
|                          |     | (c) <i>Cohort study</i> —Summarise follow-up time (eg, average and total amount)                                                                                                                             | n/a         |
| Outcome data             | 15* | <i>Cohort study</i> —Report numbers of outcome events or summary measures over time                                                                                                                          | n/a         |
|                          |     | <i>Case-control study</i> —Report numbers in each exposure category, or summary measures of exposure                                                                                                         | n/a         |
|                          |     | <i>Cross-sectional study</i> —Report numbers of outcome events or summary measures                                                                                                                           | 7-8, 14     |
| Main results             | 16  | (a) Give unadjusted estimates and, if applicable, confounder-adjusted estimates and their precision (eg, 95% confidence interval). Make clear which confounders were adjusted for and why they were included | 7-8         |
|                          |     | (b) Report category boundaries when continuous variables were categorized                                                                                                                                    | n/a         |
|                          |     | (c) If relevant, consider translating estimates of relative risk into absolute risk for a meaningful time period                                                                                             | n/a         |
| Other analyses           | 17  | Report other analyses done—eg analyses of subgroups and interactions, and sensitivity analyses                                                                                                               | n/a         |
| <b>Discussion</b>        |     |                                                                                                                                                                                                              |             |
| Key results              | 18  | Summarise key results with reference to study objectives                                                                                                                                                     | 8           |
| Limitations              | 19  | Discuss limitations of the study, taking into account sources of potential bias or imprecision. Discuss both direction and magnitude of any potential bias                                                   | 9           |
| Interpretation           | 20  | Give a cautious overall interpretation of results considering objectives, limitations, multiplicity of analyses, results from similar studies, and other relevant evidence                                   | 8-9         |
| Generalisability         | 21  | Discuss the generalisability (external validity) of the study results                                                                                                                                        | 8           |
| <b>Other information</b> |     |                                                                                                                                                                                                              |             |
| Funding                  | 22  | Give the source of funding and the role of the funders for the present study and, if applicable, for the original study on which the present article is based                                                | 9           |

\*Give information separately for cases and controls in case-control studies and, if applicable, for exposed and unexposed groups in cohort and cross-sectional studies.

**Note:** An Explanation and Elaboration article discusses each checklist item and gives methodological background and published examples of transparent reporting. The STROBE checklist is best used in conjunction with this article (freely available on the Web sites of PLoS Medicine at <http://www.plosmedicine.org/>, Annals of Internal Medicine at <http://www.annals.org/>, and Epidemiology at <http://www.epidem.com/>). Information on the STROBE Initiative is available at [www.strobe-statement.org](http://www.strobe-statement.org).

# BMJ Open

## Prevalence and Practice for Rare diseases in Primary Care

|                                 |                                                                                                                                                                                                                                                                                                                                                                        |
|---------------------------------|------------------------------------------------------------------------------------------------------------------------------------------------------------------------------------------------------------------------------------------------------------------------------------------------------------------------------------------------------------------------|
| Journal:                        | <i>BMJ Open</i>                                                                                                                                                                                                                                                                                                                                                        |
| Manuscript ID                   | bmjopen-2018-027248.R1                                                                                                                                                                                                                                                                                                                                                 |
| Article Type:                   | Research                                                                                                                                                                                                                                                                                                                                                               |
| Date Submitted by the Author:   | 20-Dec-2018                                                                                                                                                                                                                                                                                                                                                            |
| Complete List of Authors:       | Jo, Ara; University of Florida, Health Services Research, Management and Policy;<br>Larson, Samantha; University of Florida<br>Carek, Peter; University of Florida<br>Peabody, Michael R; American Board of Family Medicine,<br>Peterson, Lars E.; Amer Board Family Med<br>Mainous III, Arch; University of Florida, Health Services Research, Management, and Policy |
| <b>Primary Subject Heading</b>: | General practice / Family practice                                                                                                                                                                                                                                                                                                                                     |
| Secondary Subject Heading:      | Health services research                                                                                                                                                                                                                                                                                                                                               |
| Keywords:                       | PRIMARY CARE, PREVENTIVE MEDICINE, Quality in health care < HEALTH SERVICES ADMINISTRATION & MANAGEMENT                                                                                                                                                                                                                                                                |
|                                 |                                                                                                                                                                                                                                                                                                                                                                        |

SCHOLARONE™  
Manuscripts

## Prevalence and Practice for Rare diseases in Primary Care

Ara Jo, PhD <sup>1</sup>, Samantha Larson, MPH <sup>1</sup>, Peter J. Carek, MD, MS <sup>2</sup>, Michael R. Peabody, PhD <sup>3</sup>, Lars E. Peterson, MD, PhD <sup>3,4</sup>, Arch G. Mainous III, PhD <sup>1,2</sup>

1. Department of Health Services Research, Management and Policy, University of Florida

2. Department of Community Health and Family Medicine, University of Florida

3. The American Board of Family Medicine, Lexington, KY

4. Department of Family and Community Medicine, University of Kentucky

Corresponding Author:

Ara Jo, PhD

Department of Health Services Research, Management and Policy

University of Florida

Health Sciences Center, PO Box 100195

Gainesville, FL 32610 USA

Phone: 352-273-6539

Fax: 352-273-6075

[ara13j@ufl.edu](mailto:ara13j@ufl.edu)

Word count of the abstract: 289

Word count of the text: 1,717

Tables: 3

**Keywords:** Rare disease, primary care, scope of practice

## Abstract

**Objectives:** There are more than 7,000 rare diseases in the US and they are prevalent in 8% of the population. Due to life-threatening risk and limited therapies, early detection and treatment are critical. The purpose of this study was to explore characteristics of visits for patients with rare diseases seen by primary care physicians (PCPs).

**Design:** The study used a cross sectional study using a national representative dataset, the National Ambulatory Medical Care Survey for the years 2012-2014.

**Setting:** Primary care setting

**Participants:** Visits to PCPs (n= 22,306 representing 354,507,772 office visits to PCPs).

**Primary Outcome Measures:** Prevalence of rare diseases in visits of PCPs was the primary outcome. Bivariate analyses and logistic regression analyses were used to compare patients with rare diseases and those without rare diseases and examined characteristics of PCP visits for rare diseases and practice pattern.

**Results:** Among outpatient visits to PCPs, rare diseases account for 1.6% of the visits. The majority of patients with rare diseases were established patients (93.0%) and almost half (49.0%) were enrolled in public insurance programs. The time spent in visits for rare diseases (22.4 minutes) and visits for more common diseases (21.3 minutes) was not significantly different (p=.09). In an adjusted model controlling for patient characteristics (age, sex, types of insurance, reason for this visit, total number of chronic disease, having a rare disease and established or new patient), patients with

1  
2  
3 rare diseases were 52% more likely to be referred to another provider (OR 1.52, 95%  
4  
5 CI, 1.01-2.28).  
6  
7

8 **Conclusions:** Visits for rare diseases are uncommon in primary care practice. Future  
9  
10 research may help to explain whether this low level of management of rare diseases in  
11  
12 primary care practice is consistent with a goal of a broad scope of care.  
13  
14  
15

### 16 17 18 19 **Strengths and limitations of this study** 20

- 21  
22 • This study is the first research to investigate characteristics of patients with rare  
23  
24 diseases seen in primary care practice and the association between physician  
25  
26 referral and rare disease diagnosis.  
27  
28
- 29  
30 • The study used population-based national representative data allowing for  
31  
32 generalizability.  
33
- 34  
35 • Primary care physicians may play a vital role in providing continuous care and  
36  
37 managing patients with rare diseases effectively.  
38
- 39  
40 • The study is limited to the actions recorded in one visit due to study design.  
41
- 42  
43 • The study was unable to determine if that referral is for a consult or part of a  
44  
45 shared care relationship between primary care and specialty care  
46  
47  
48  
49  
50  
51  
52  
53  
54  
55  
56  
57

## Introduction

Primary Care Physicians (PCPs) are trained to provide care for a broad scope of conditions within their patient population. When PCPs maintain a broad scope of practice this safeguards access and quality of care for the general population. Some of these conditions are managed directly by the PCP and with others the PCP coordinates the care for the patient. One recent study indicated that in one year, family physicians typically manage about 1,700 diagnoses in office visits, with 100 diagnoses managed frequently.(1)

In addition to common, high prevalence diseases like diabetes, hypertension and arthritis, a substantial proportion of the general patient population, has a rare disease, or diseases. As of 2017, the National Institute of Health (NIH) Genetic and Rare Disease Information Center (GARD) had identified 7,000 rare diseases, affecting approximately 25-30 million people in the US population. (2) Rare diseases are categorized as life-threatening, with only few limited effective therapies available. In addition to the emotional and physical burden associated with diagnosis, patients with a rare disease often face financial burden due to the significant cost associated with drugs and therapies. As such, early detection and treatment are critical. For example, in one study, more than half of patients with rare diseases being seen at a PCP practice had been diagnosed with rare diseases at a PCP practice.(3)

However, to date there have been few studies investigating the role of PCPs in the management of patients with rare diseases. The purpose of this study was to



1  
2  
3 examine in a nationally representative sample of visits, the prevalence of rare diseases  
4  
5 cared for in primary care practice as well as characteristics of patients and providers.  
6  
7

## 8 **Methods**

9  
10  
11 This study used the National Ambulatory Medical Care Survey (NAMCS), a national  
12  
13 representative dataset, for the years 2012-2014. The NAMCS is a national probability  
14  
15 sample survey of ambulatory medical care visits to office-based physicians that allows  
16  
17 for national estimates regarding medical care in the US.(3) NAMCS data is collected  
18  
19 annually by the National Center for Health Statistics (NCHS). The sample frame for  
20  
21 NAMCS data in the years 2012-2014 was composed of PCPs who specialize in primary  
22  
23 care (e.g., General and Family Practice, Internal medicine and Pediatrics), and who  
24  
25 identified themselves as the primary care physician (PCP) of the patient.(4) This list  
26  
27 conforms to the definition used by the NAMCS to categorize primary care. Diagnosis  
28  
29 was determined based upon the ICD-9 codes and the diagnosis made by a PCP at a  
30  
31 visit was electronically recorded in the patient record form. The patient report form  
32  
33 provided preexisting conditions, current diagnosis and new diagnosis. (5) Thus, more  
34  
35 than 30 diagnoses can be managed via this report form. (6) Furthermore, this report  
36  
37 form allows us to identify established patients who have visited before whereas it does  
38  
39 not allow us to estimate numbers of previous visits. The unweighted sample size was  
40  
41 22,306 representing 354,507,772 office visits to PCPs in the US from 2012-2014.  
42  
43  
44  
45  
46  
47  
48

## 49 **Rare disease**

50  
51 A rare disease is defined as a disease or a disorder that affects fewer than 200,000  
52  
53 people in the US.(2, 7) For this study, diagnoses were identified as a rare disease using  
54  
55  
56  
57

1  
2  
3 the list provided by the GARD Information Center.(2) Two independent researchers and  
4  
5 (i.e., Dr. Jo and Larson) and one family medicine physician (i.e., Dr. Carek) reviewed all  
6  
7 new diagnosis in designated study years and identified rare diseases by comparing the  
8  
9 list of GARD. With consensus agreements, rare diseases for the study were  
10  
11  
12 determined.  
13  
14

### 15 Independent Variables

16  
17 Demographics of patients seen by PCPs, such as age, gender and race/ethnicity, were  
18  
19 used. Gender and race/ethnicity (i.e., Non-Hispanic White, Non-Hispanic Black,  
20  
21 Hispanics and Others) were considered categorical variables whereas age was used as  
22  
23 a continuous variable. In addition, their form of health insurance, major reason for the  
24  
25 visit, and total number of diagnosed chronic diseases were included as categorical  
26  
27 variables. Health insurance was stratified into four categories: private insurance, public  
28  
29 insurance such as Medicaid and Medicare, self-pay, and others. Major reason for the  
30  
31 visit was also categorized into four groups: new problems, chronic problems, pre- or  
32  
33 post-surgery care and preventive care.  
34  
35  
36  
37  
38

39 Providers' characteristics including practice location (i.e., urban or rural), referral to  
40  
41 other providers (i.e., yes or no) were examined. Time spent with providers in primary  
42  
43 care setting was compared between patients with rare diseases and those without rare  
44  
45 diseases.  
46  
47  
48

### 49 Statistical Analysis

50  
51 To account for the complex survey design used in the NAMCS, a weighted variable was  
52  
53 used to consider survey design effect. This allows for us to provide national estimates of  
54  
55  
56  
57

1  
2  
3 United States ambulatory health care visits to office-based physicians and community  
4 health centers.(3) Also, it allows us to produce national estimates of the ambulatory  
5 health care utilization in the US (3). The prevalence of rare disease seen in the primary  
6 care office visit was estimated. Chi-square tests were used to compare characteristics  
7 of PCPs who care for rare diseases against those who do not. Logistic regression was  
8 also employed to examine the association between PCP referral to other providers and  
9 patient diagnosis of a rare disease. All analyses were conducted in SAS version 9.4  
10 (Cary, NC). This study was approved as exempt by the Institutional Review Board at the  
11 University of Florida.  
12  
13  
14  
15  
16  
17  
18  
19  
20  
21  
22  
23

#### 24 Patient and Public Involvement

25  
26  
27  
28 Patients and/or public were not involved in this study.  
29  
30

#### 31 Results

32  
33  
34 The final sample was 22,306 representing 354,507,772 office visits to PCPs in  
35 the US from 2012-2014. A total of 1,508 PCPs participated to submit data for sample  
36 patient visits. Of the total patient visits to a PCP, a rare disease was noted in 1.6% of  
37 those visits. PCPs cared for 177 different rare diseases. Patients with rare diseases  
38 were significantly older than those without rare diseases (age difference = 8.3 years,  
39  $p < .01$ ), while no significant differences were found in the distribution of sex and  
40 race/ethnicity (Table 1). The majority of patients with rare diseases were established  
41 patients (93.0%), having been seen by the PCP more than one time, and almost half  
42 (49.3%) were enrolled in private insurance programs. Of the visits for patients  
43 diagnosed with a rare disease, 39.0% visited their PCPs with a comorbid chronic  
44  
45  
46  
47  
48  
49  
50  
51  
52  
53  
54  
55  
56  
57  
58  
59  
60

1  
2  
3 problem. In addition, they had a higher total number of chronic diseases compared to  
4 patients without rare diseases (Table 1).  
5  
6

7  
8 Of visits by patients with rare disease, 14.3% were referred to other providers (Table 2).  
9  
10 While PCPs spent slightly more time with their patients who had rare diseases (22.4  
11 min), compared to patients without rare diseases (21.3 min), it was not significantly  
12 different (Table 2). The majority of visits for patients with rare diseases and more  
13 common diseases who were seen by PCPs were located in urban areas. PCPs  
14 practicing in rural areas (7.6%) were not significantly less likely than PCPs practicing in  
15 urban areas (16.8%;  $p=.06$ ) to refer patients with rare diseases to another physician. In  
16 a bivariate analysis, care for rare disease was also not associated with rurality ( $p=.32$ )  
17 (Table 2).  
18  
19  
20  
21  
22  
23  
24  
25  
26  
27  
28  
29

30 In an unadjusted regression model, patients with rare diseases were 69% more likely to  
31 be referred to other providers than those without rare diseases. After controlling for  
32 covariates, such as patients' characteristics (i.e., age, sex, race/ethnicity, types of  
33 insurance, major reason for this visit, total number of chronic disease, having a rare  
34 disease and established or new patient), patients with rare diseases were 52% more  
35 likely to be referred to another provider than those without rare diseases (Table 3).  
36  
37  
38  
39  
40  
41  
42  
43  
44

## 45 Discussion

46  
47 This study found that few patients with a rare disease were identified as being managed  
48 in primary care practice. Patients with rare diseases in the primary care setting show  
49 significantly older and have more comorbidities compared to those without a rare  
50 disease diagnosis whereas patients with rare diseases are comparable to those without  
51  
52  
53  
54  
55  
56  
57

1  
2  
3 rare diseases in terms of sex distribution, race/ethnicity and types of health insurance.

4  
5 Not surprisingly, visits in primary care for patients diagnosed with rare diseases are  
6  
7 more likely than patients without rare diseases to lead to referral to another provider.

8  
9  
10 To our knowledge, this is the first study to investigate characteristics of patients with  
11  
12 rare diseases seen in primary care practice and the association between physician  
13  
14 referral and rare disease diagnosis.  
15

16  
17  
18 Much of medical practice and the corresponding comfort in diagnosing and treating  
19  
20 conditions is affected by the frequency of occurrence of the condition and pattern  
21  
22 recognition. Rare diseases are by their very nature uncommon and thus PCPs may not  
23  
24 always feel comfortable with the nuances of treatment and potential complications for a  
25  
26 disease that they encounter very infrequently. According to the National Academy of  
27  
28 Medicine, since rare diseases tend to accompany multiple common conditions, it  
29  
30 disrupts a clinician's ability to recognize clues of rare diseases.(8) In many of these  
31  
32 cases PCPs need more than a consult from a specialist, especially when the primary  
33  
34 care team does not have the specialized medical knowledge. Receiving all of their care  
35  
36 from specialists may not be the best situation for the patient. Patients with rare diseases  
37  
38 need to be managed in primary care or at least have shared care between primary care  
39  
40 and specialists in complementary roles to provide a more effective management of  
41  
42 these complex patients.  
43  
44  
45  
46  
47

48  
49 There are some limitations to this study. First, due to the design of the NAMCS we are  
50  
51 limited to the actions recorded in that one visit. The design does allow us to have an  
52  
53 understanding of the types of patients seen in primary care but it is not data on a cohort  
54  
55 of patients. Thus, we do not know what sort of care may have transpired between the  
56  
57

1  
2  
3 patient and the physician in previous visits. Also, it is not able to explore the linkage of  
4 multiple consultations with specialists pre- or post-visit to PCPs. Second, we are able to  
5 see if patients are referred in that one visit, we are unable to determine if that referral is  
6 for a consult or part of a shared care relationship between primary care and specialty  
7 care.  
8  
9  
10  
11  
12  
13  
14

## 15 Conclusion

16  
17  
18 This study identified characteristics of patients with rare diseases who are seen in  
19 primary care practice and the delivery patterns of PCPs managing patients with rare  
20 diseases. Findings from this study suggest that PCPs must possess a broad scope of  
21 practice in order to deliver comprehensive, high-quality care. A better understanding of  
22 the overall management of patients with rare diseases managed solely outside of  
23 primary care would help to improve the care for these patients.  
24  
25  
26  
27  
28  
29  
30  
31  
32  
33  
34  
35  
36  
37  
38  
39  
40  
41  
42  
43  
44  
45  
46  
47  
48  
49  
50  
51  
52  
53  
54  
55  
56  
57  
58  
59  
60

## 61 Acknowledgements

### 62 Contributors:

63 Ara Jo, PhD led the entire research as the first and corresponding author from writing  
64 the manuscript, analyzing the data and interpretation.

65 Samantha Larson, MPH, analyzed the data and contributed to writing the manuscript.

66 Peter J. Carek, MD, MS contributed to writing the manuscript.

1  
2  
3 Michael R. Peabody, PhD, contributed to writing the manuscript.  
4  
5

6 Lars E. Peterson, MD, PhD, contributed to writing the manuscript.  
7  
8

9 Arch G. Mainous III, PhD, contributed to writing the manuscript and guided the direction  
10  
11 of the study.  
12  
13

14  
15  
16  
17  
18 Conflict of Interest: Drs. Peterson and Peabody are employees of the American Board  
19  
20 of Family Medicine. No other authors have no declaration of conflict of interests.  
21  
22

23 Funding Statement: This work was supported by a grant from the American Board of  
24  
25 Family Medicine Foundation.  
26  
27

28  
29 Ethics approval: This study was approved as exempt by the Institutional Review Board  
30  
31 at the University of Florida.  
32  
33

34 Data sharing statement: Data are available through the National Ambulatory Medical  
35  
36 Care Survey access from  
37  
38 [https://www.cdc.gov/nchs/ahcd/datasets\\_documentation\\_related.htm](https://www.cdc.gov/nchs/ahcd/datasets_documentation_related.htm).  
39  
40  
41  
42  
43  
44  
45  
46  
47  
48  
49  
50  
51  
52  
53  
54  
55  
56  
57  
58  
59  
60

1  
2  
3  
4  
5  
6  
7  
8  
9  
10  
11  
12  
13  
14  
15  
16  
17  
18  
19  
20  
21  
22  
23  
24  
25  
26  
27  
28  
29  
30  
31  
32  
33  
34  
35  
36  
37  
38  
39  
40  
41  
42  
43  
44  
45  
46  
47  
48  
49  
50  
51  
52  
53  
54  
55  
56  
57  
58  
59  
60

For peer review only



## References

1. Peabody MR, O'Neill TR, Stelter KL, Puffer JC. Frequency and Criticality of Diagnoses in Family Medicine Practices: From the National Ambulatory Medical Care Survey (NAMCS). *The Journal of the American Board of Family Medicine*. 2018;31(1):126-38.
2. GARD. FAQs About Rare Diseases: National Center for Advancing Translational Sciences; 11/30/2017 [Available from: <https://rarediseases.info.nih.gov/diseases/pages/31/faqs-about-rare-diseases>].
3. Phillips WR. Zebras on the commons: rare conditions in family practice. *The Journal of the American Board of Family Practice*. 2004;17(4):283-6.
4. NCHS. NAMCS Scope and Sample Design: Centers for Disease Control and Prevention; 11/6/2015 [Available from: [https://www.cdc.gov/nchs/ahcd/ahcd\\_scope.htm](https://www.cdc.gov/nchs/ahcd/ahcd_scope.htm)].
5. NHCS. 2014 NAMCS micro-data file documentation. Centers for Disease Control and Prevention; 2014.
6. NCHS. National Ambulatory Medical Care Survey 2018 Patient Record. Available from [https://www.cdc.gov/nchs/data/ahcd/2018\\_NAMCS\\_Patient\\_Record\\_Sample\\_Card.pdf](https://www.cdc.gov/nchs/data/ahcd/2018_NAMCS_Patient_Record_Sample_Card.pdf).

- 1  
2  
3 7. US Food & Drug Administration (FDA). Orphan Drug Act - Relevant Excerpts. August  
4  
5 2013 Available from  
6  
7 <https://www.fda.gov/forindustry/developingproductsforrareconditions/howto>  
8  
9 [applyfororphanproductdesignation/ucm364750.htm](https://www.fda.gov/forindustry/developingproductsforrareconditions/howto).  
10  
11  
12  
13  
14  
15  
16 8. Boat TF, Field MJ. Rare diseases and orphan products: Accelerating research and  
17  
18 development: National Academies Press; 2011.  
19  
20  
21  
22  
23  
24  
25  
26  
27  
28  
29  
30  
31  
32  
33  
34  
35  
36  
37  
38  
39  
40  
41  
42  
43  
44  
45  
46  
47  
48  
49  
50  
51  
52  
53  
54  
55  
56  
57  
58  
59  
60

Table 1. Characteristics of Patients with Rare Diseases in Primary Care, NAMCS 2012-2014 (unweighted N= 22,306, weighted N= 354,507,772)

|                                    | Patients with rare diseases (%) | Patients without rare diseases (%) | p-value |
|------------------------------------|---------------------------------|------------------------------------|---------|
| Unweighted Sample Size             | 363                             | 21,943                             |         |
| Weighted Sample Size               | 5,581,791                       | 348,925,981                        |         |
| Mean Age (year-old) **             | 47.7                            | 39.4                               | <0.001  |
| Sex                                |                                 |                                    |         |
| Female                             | 56.4                            | 53.8                               | 0.44    |
| Race                               |                                 |                                    |         |
| Non-Hispanic White                 | 75.0                            | 70.6                               | 0.54    |
| Non-Hispanic Black                 | 8.6                             | 10.1                               |         |
| Hispanics                          | 11.7                            | 14.3                               |         |
| Others                             | 4.7                             | 5.0                                |         |
| Insurance Types                    |                                 |                                    |         |
| Private Insurance                  | 49.3                            | 54.6                               | 0.15    |
| Public Insurance                   | 47.3                            | 40.0                               |         |
| Self-pay                           | 1.8                             | 3.5                                |         |
| Other                              | 1.5                             | 1.9                                |         |
| Major reasons for this visit**     |                                 |                                    |         |
| New Problems                       | 33.7                            | 42.6                               | 0.002   |
| Chronic Problems                   | 39.0                            | 28.7                               |         |
| Pre-/Post-Surgery                  | 27.3                            | 28.7                               |         |
| Preventive Care                    | 0.0                             | 0.0                                |         |
| Total Number of Chronic Diseases** | 1.3                             | 1.0                                | 0.001   |

\*\* statistical significant level at .05

Table 2. Practice Characteristics of Primary Care Physicians who Care for Patients with Rare Diseases using NAMCS, 2012-2014

|                                 | Patients with rare diseases | Patients without rare diseases | p-value |
|---------------------------------|-----------------------------|--------------------------------|---------|
| Practicing Area                 |                             |                                |         |
| Urban                           | 84.5                        | 86.4                           | 0.32    |
| Rural                           | 15.5                        | 13.6                           |         |
| Referral to Other Providers**   |                             |                                |         |
| Yes                             | 14.3                        | 9.0                            | 0.01    |
| No                              | 85.7                        | 91.0                           |         |
| Time Spent with Providers (min) | 22.4                        | 21.3                           | 0.09    |

\*\* statistical significant level at .05

Table 3. Odds Ratios of Referral Using Unadjusted and Adjusted Logistic Regression Analyses using NAMCS, 2012-2014

|                           | Unadjusted OR (95% CI) | Adjusted OR (95% CI) |
|---------------------------|------------------------|----------------------|
| Not having a rare disease | Reference              | Reference            |
| Having a rare disease     | 1.69 (1.15-2.48)**     | 1.52 (1.01-2.28)**   |

\*Controlled for age, gender, race/ethnicity, types of insurance, major reason for this visit, total number of chronic disease, having a rare disease and established vs. new patient.

\*\* statistical significant level at .05

For peer review only

## STROBE Statement—checklist of items that should be included in reports of observational studies

|                              | Item No | Recommendation                                                                                                                                                                                                                                                                                                                                                                                                                                                         | Page |
|------------------------------|---------|------------------------------------------------------------------------------------------------------------------------------------------------------------------------------------------------------------------------------------------------------------------------------------------------------------------------------------------------------------------------------------------------------------------------------------------------------------------------|------|
| <b>Title and abstract</b>    | 1       | (a) Indicate the study's design with a commonly used term in the title or the abstract                                                                                                                                                                                                                                                                                                                                                                                 | 1    |
|                              |         | (b) Provide in the abstract an informative and balanced summary of what was done and what was found                                                                                                                                                                                                                                                                                                                                                                    | 2-3  |
| <b>Introduction</b>          |         |                                                                                                                                                                                                                                                                                                                                                                                                                                                                        |      |
| Background/rationale         | 2       | Explain the scientific background and rationale for the investigation being reported                                                                                                                                                                                                                                                                                                                                                                                   | 4-5  |
| Objectives                   | 3       | State specific objectives, including any prespecified hypotheses                                                                                                                                                                                                                                                                                                                                                                                                       | 4-5  |
| <b>Methods</b>               |         |                                                                                                                                                                                                                                                                                                                                                                                                                                                                        |      |
| Study design                 | 4       | Present key elements of study design early in the paper                                                                                                                                                                                                                                                                                                                                                                                                                | 5    |
| Setting                      | 5       | Describe the setting, locations, and relevant dates, including periods of recruitment, exposure, follow-up, and data collection                                                                                                                                                                                                                                                                                                                                        | n/a  |
| Participants                 | 6       | (a) <i>Cohort study</i> —Give the eligibility criteria, and the sources and methods of selection of participants. Describe methods of follow-up<br><i>Case-control study</i> —Give the eligibility criteria, and the sources and methods of case ascertainment and control selection. Give the rationale for the choice of cases and controls<br><i>Cross-sectional study</i> —Give the eligibility criteria, and the sources and methods of selection of participants | 5    |
|                              |         | (b) <i>Cohort study</i> —For matched studies, give matching criteria and number of exposed and unexposed<br><i>Case-control study</i> —For matched studies, give matching criteria and the number of controls per case                                                                                                                                                                                                                                                 | n/a  |
| Variables                    | 7       | Clearly define all outcomes, exposures, predictors, potential confounders, and effect modifiers. Give diagnostic criteria, if applicable                                                                                                                                                                                                                                                                                                                               | 5-6  |
| Data sources/<br>measurement | 8*      | For each variable of interest, give sources of data and details of methods of assessment (measurement). Describe comparability of assessment methods if there is more than one group                                                                                                                                                                                                                                                                                   | 5-6  |
| Bias                         | 9       | Describe any efforts to address potential sources of bias                                                                                                                                                                                                                                                                                                                                                                                                              | n/a  |
| Study size                   | 10      | Explain how the study size was arrived at                                                                                                                                                                                                                                                                                                                                                                                                                              | 5    |
| Quantitative variables       | 11      | Explain how quantitative variables were handled in the analyses. If applicable, describe which groupings were chosen and why                                                                                                                                                                                                                                                                                                                                           | n/a  |
| Statistical methods          | 12      | (a) Describe all statistical methods, including those used to control for confounding                                                                                                                                                                                                                                                                                                                                                                                  | 6    |
|                              |         | (b) Describe any methods used to examine subgroups and interactions                                                                                                                                                                                                                                                                                                                                                                                                    | 6    |
|                              |         | (c) Explain how missing data were addressed                                                                                                                                                                                                                                                                                                                                                                                                                            | n/a  |
|                              |         | (d) <i>Cohort study</i> —If applicable, explain how loss to follow-up was addressed<br><i>Case-control study</i> —If applicable, explain how matching of cases and controls was addressed<br><i>Cross-sectional study</i> —If applicable, describe analytical methods taking account of sampling strategy                                                                                                                                                              | 5-6  |
|                              |         | (e) Describe any sensitivity analyses                                                                                                                                                                                                                                                                                                                                                                                                                                  |      |

| <b>Results</b>           |     |                                                                                                                                                                                                              | <b>Page</b> |
|--------------------------|-----|--------------------------------------------------------------------------------------------------------------------------------------------------------------------------------------------------------------|-------------|
| Participants             | 13* | (a) Report numbers of individuals at each stage of study—eg numbers potentially eligible, examined for eligibility, confirmed eligible, included in the study, completing follow-up, and analysed            | n/a         |
|                          |     | (b) Give reasons for non-participation at each stage                                                                                                                                                         | n/a         |
|                          |     | (c) Consider use of a flow diagram                                                                                                                                                                           | n/a         |
| Descriptive data         | 14* | (a) Give characteristics of study participants (eg demographic, clinical, social) and information on exposures and potential confounders                                                                     | 7           |
|                          |     | (b) Indicate number of participants with missing data for each variable of interest                                                                                                                          | n/a         |
|                          |     | (c) <i>Cohort study</i> —Summarise follow-up time (eg, average and total amount)                                                                                                                             | n/a         |
| Outcome data             | 15* | <i>Cohort study</i> —Report numbers of outcome events or summary measures over time                                                                                                                          | n/a         |
|                          |     | <i>Case-control study</i> —Report numbers in each exposure category, or summary measures of exposure                                                                                                         | n/a         |
|                          |     | <i>Cross-sectional study</i> —Report numbers of outcome events or summary measures                                                                                                                           | 7-8, 14     |
| Main results             | 16  | (a) Give unadjusted estimates and, if applicable, confounder-adjusted estimates and their precision (eg, 95% confidence interval). Make clear which confounders were adjusted for and why they were included | 7-8         |
|                          |     | (b) Report category boundaries when continuous variables were categorized                                                                                                                                    | n/a         |
|                          |     | (c) If relevant, consider translating estimates of relative risk into absolute risk for a meaningful time period                                                                                             | n/a         |
| Other analyses           | 17  | Report other analyses done—eg analyses of subgroups and interactions, and sensitivity analyses                                                                                                               | n/a         |
| <b>Discussion</b>        |     |                                                                                                                                                                                                              |             |
| Key results              | 18  | Summarise key results with reference to study objectives                                                                                                                                                     | 8           |
| Limitations              | 19  | Discuss limitations of the study, taking into account sources of potential bias or imprecision. Discuss both direction and magnitude of any potential bias                                                   | 9           |
| Interpretation           | 20  | Give a cautious overall interpretation of results considering objectives, limitations, multiplicity of analyses, results from similar studies, and other relevant evidence                                   | 8-9         |
| Generalisability         | 21  | Discuss the generalisability (external validity) of the study results                                                                                                                                        | 8           |
| <b>Other information</b> |     |                                                                                                                                                                                                              |             |
| Funding                  | 22  | Give the source of funding and the role of the funders for the present study and, if applicable, for the original study on which the present article is based                                                | 9           |

\*Give information separately for cases and controls in case-control studies and, if applicable, for exposed and unexposed groups in cohort and cross-sectional studies.

**Note:** An Explanation and Elaboration article discusses each checklist item and gives methodological background and published examples of transparent reporting. The STROBE checklist is best used in conjunction with this article (freely available on the Web sites of PLoS Medicine at <http://www.plosmedicine.org/>, Annals of Internal Medicine at <http://www.annals.org/>, and Epidemiology at <http://www.epidem.com/>). Information on the STROBE Initiative is available at [www.strobe-statement.org](http://www.strobe-statement.org).

# BMJ Open

## Prevalence and Practice for Rare diseases in Primary Care

|                                 |                                                                                                                                                                                                                                                                                                                                                                        |
|---------------------------------|------------------------------------------------------------------------------------------------------------------------------------------------------------------------------------------------------------------------------------------------------------------------------------------------------------------------------------------------------------------------|
| Journal:                        | <i>BMJ Open</i>                                                                                                                                                                                                                                                                                                                                                        |
| Manuscript ID                   | bmjopen-2018-027248.R2                                                                                                                                                                                                                                                                                                                                                 |
| Article Type:                   | Research                                                                                                                                                                                                                                                                                                                                                               |
| Date Submitted by the Author:   | 28-Feb-2019                                                                                                                                                                                                                                                                                                                                                            |
| Complete List of Authors:       | Jo, Ara; University of Florida, Health Services Research, Management and Policy;<br>Larson, Samantha; University of Florida<br>Carek, Peter; University of Florida<br>Peabody, Michael R; American Board of Family Medicine,<br>Peterson, Lars E.; Amer Board Family Med<br>Mainous III, Arch; University of Florida, Health Services Research, Management, and Policy |
| <b>Primary Subject Heading</b>: | General practice / Family practice                                                                                                                                                                                                                                                                                                                                     |
| Secondary Subject Heading:      | Health services research                                                                                                                                                                                                                                                                                                                                               |
| Keywords:                       | PRIMARY CARE, PREVENTIVE MEDICINE, Quality in health care < HEALTH SERVICES ADMINISTRATION & MANAGEMENT                                                                                                                                                                                                                                                                |
|                                 |                                                                                                                                                                                                                                                                                                                                                                        |

SCHOLARONE™  
Manuscripts



## Prevalence and Practice for Rare diseases in Primary Care

Ara Jo, PhD <sup>1</sup>, Samantha Larson, MPH <sup>1</sup>, Peter J. Carek, MD, MS <sup>2</sup>, Michael R. Peabody, PhD <sup>3</sup>, Lars E. Peterson, MD, PhD <sup>3,4</sup>, Arch G. Mainous III, PhD <sup>1,2</sup>

1. Department of Health Services Research, Management and Policy, University of Florida

2. Department of Community Health and Family Medicine, University of Florida

3. The American Board of Family Medicine, Lexington, KY

4. Department of Family and Community Medicine, University of Kentucky

Corresponding Author:

Ara Jo, PhD

Department of Health Services Research, Management and Policy

University of Florida

Health Sciences Center, PO Box 100195

Gainesville, FL 32610 USA

Phone: 352-273-6539

Fax: 352-273-6075

[ara13j@ufl.edu](mailto:ara13j@ufl.edu)

Word count of the abstract: 289

Word count of the text: 1,907

Tables: 3

**Keywords:** Rare disease, primary care, scope of practice

## Abstract

**Objectives:** There are more than 7,000 rare diseases in the US and they are prevalent in 8% of the population. Due to life-threatening risk and limited therapies, early detection and treatment are critical. The purpose of this study was to explore characteristics of visits for patients with rare diseases seen by primary care physicians (PCPs).

**Design:** The study used a cross sectional study using a national representative dataset, the National Ambulatory Medical Care Survey for the years 2012-2014.

**Setting:** Primary care setting

**Participants:** Visits to PCPs (n= 22,306 representing 354,507,772 office visits to PCPs).

**Primary Outcome Measures:** Prevalence of rare diseases in visits of PCPs was the primary outcome. Bivariate analyses and logistic regression analyses were used to compare patients with rare diseases and those without rare diseases and examined characteristics of PCP visits for rare diseases and practice pattern.

**Results:** Among outpatient visits to PCPs, rare diseases account for 1.6% of the visits. The majority of patients with rare diseases were established patients (93.0%) and almost half (49.0%) were enrolled in public insurance programs. The time spent in visits for rare diseases (22.4 minutes) and visits for more common diseases (21.3 minutes) was not significantly different (p=.09). In an adjusted model controlling for patient characteristics (age, sex, types of insurance, reason for this visit, total number of chronic disease, having a rare disease and established or new patient), patients with

1  
2  
3 rare diseases were 52% more likely to be referred to another provider (OR 1.52, 95%  
4  
5 CI, 1.01-2.28).  
6  
7

8 **Conclusions:** Visits for rare diseases are uncommon in primary care practice. Future  
9  
10 research may help to explain whether this low level of management of rare diseases in  
11  
12 primary care practice is consistent with a goal of a broad scope of care.  
13  
14  
15

### 16 17 18 19 **Strengths and limitations of this study** 20 21

- 22 • This study is the first research to investigate characteristics of patients with rare  
23 diseases seen in primary care practice and the association between physician  
24 referral and rare disease diagnosis.  
25  
26
- 27 • The study used population-based national representative data allowing for  
28 generalizability.  
29
- 30 • Primary care physicians may play a vital role in providing continuous care and  
31 managing patients with rare diseases effectively.  
32  
33
- 34 • The study is limited to the actions recorded in one visit due to study design.  
35  
36
- 37 • The study was unable to determine if that referral is for a consult or part of a  
38 shared care relationship between primary care and specialty care  
39  
40  
41  
42  
43  
44  
45  
46  
47  
48  
49  
50  
51  
52  
53  
54  
55  
56  
57

## Introduction

Primary Care Physicians (PCPs) are trained to provide care for a broad scope of conditions within their patient population. When PCPs maintain a broad scope of practice this safeguards access and quality of care for the general population. Some of these conditions are managed directly by the PCP and with others the PCP coordinates the care for the patient. One recent study indicated that in one year, family physicians typically manage about 1,700 diagnoses in office visits, with 100 diagnoses managed frequently.(1)

In addition to common, high prevalence diseases like diabetes, hypertension and arthritis, a substantial proportion of the general patient population, has a rare disease, or diseases. As of 2017, the National Institute of Health (NIH) Genetic and Rare Disease Information Center (GARD) had identified 7,000 rare diseases, affecting approximately 25-30 million people in the US population. (2) Rare diseases are categorized as life-threatening, with only few limited effective therapies available. In addition to the emotional and physical burden associated with diagnosis, patients with a rare disease often face financial burden due to the significant cost associated with drugs and therapies. As such, early detection and treatment are critical. For example, in one study, more than half of patients with rare diseases being seen at a PCP practice had been diagnosed with rare diseases at a PCP practice.(3)

However, to date there have been few studies investigating the role of PCPs in the management of patients with rare diseases. The purpose of this study was to

1  
2  
3 examine in a nationally representative sample of visits, the prevalence of rare diseases  
4  
5 cared for in primary care practice as well as characteristics of patients and providers.  
6  
7

## 8 **Methods**

9

10  
11 This study used the National Ambulatory Medical Care Survey (NAMCS), a national  
12  
13 representative dataset, for the years 2012-2014. The NAMCS is a national probability  
14  
15 sample survey of ambulatory medical care visits to office-based physicians that allows  
16  
17 for national estimates regarding medical care in the US. (3) Nonfederally employed  
18  
19 physicians defined by the American Medical Association and the American Osteopathic  
20  
21 Association who were principally engaged in patient care activities and who are not  
22  
23 specialized in anesthesiology, pathology and radiology were eligible. Also physicians  
24  
25 who are younger than 85 years of age at the time of the survey were eligible. Based on  
26  
27 multistage probability design, eligible PCPs were selected and informed about the  
28  
29 survey and those who agreed to participate to the survey were included in the data. (3)  
30  
31 NAMCS data is collected annually by the National Center for Health Statistics (NCHS).  
32  
33 It is electronic record collected by the Census Bureau in the US and multiple steps were  
34  
35 implemented to process and review the data based on the NCHS protocol. The data  
36  
37 estimates to be reliable met two criteria, 1) sample records should be at least 30, and 2)  
38  
39 a relative standard error should be 30 percent or less. (3) The sample frame for NAMCS  
40  
41 data in the years 2012-2014 was composed of PCPs who specialize in primary care  
42  
43 (e.g., General and Family Practice, Internal medicine and Pediatrics), and who identified  
44  
45 themselves as the primary care physician (PCP) of the patient.(4) This list conforms to  
46  
47 the definition used by the NAMCS to categorize primary care. Diagnosis was  
48  
49 determined based upon the ICD-9 codes and the diagnosis made by a PCP at a visit  
50  
51  
52  
53  
54  
55  
56  
57

1  
2  
3 was electronically recorded in the patient record form. The patient report form provided  
4  
5 preexisting conditions, current diagnosis and new diagnosis. (5) Thus, more than 30  
6  
7 diagnoses can be managed via this report form. (6) Furthermore, this report form allows  
8  
9 us to identify established patients who have visited before whereas it does not allow us  
10  
11 to estimate numbers of previous visits. The unweighted sample size was 22,306  
12  
13 representing 354,507,772 office visits to PCPs in the US from 2012-2014.  
14  
15  
16  
17

### 18 Rare disease

19  
20 A rare disease is defined as a disease or a disorder that affects fewer than 200,000  
21  
22 people in the US.(2, 7) For this study, diagnoses were identified as a rare disease using  
23  
24 the list provided by the GARD Information Center.(2) Two independent researchers and  
25  
26 (i.e., Dr. Jo and Larson) and one family medicine physician (i.e., Dr. Carek) reviewed all  
27  
28 new diagnosis in designated study years and identified rare diseases by comparing the  
29  
30 list of GARD. With consensus agreements, rare diseases for the study were  
31  
32 determined.  
33  
34  
35  
36

### 37 Independent Variables

38  
39 Demographics of patients seen by PCPs, such as age, gender and race/ethnicity, were  
40  
41 used. Gender and race/ethnicity (i.e., Non-Hispanic White, Non-Hispanic Black,  
42  
43 Hispanics and Others) were considered categorical variables whereas age was used as  
44  
45 a continuous variable. In addition, their form of health insurance, major reason for the  
46  
47 visit, and total number of diagnosed chronic diseases were included as categorical  
48  
49 variables. Health insurance was stratified into four categories: private insurance, public  
50  
51 insurance such as Medicaid and Medicare, self-pay, and others. Major reason for the  
52  
53  
54  
55  
56  
57  
58  
59  
60

1  
2  
3 visit was also categorized into four groups: new problems, chronic problems, pre- or  
4  
5 post-surgery care and preventive care.  
6  
7

8  
9 Providers' characteristics including practice location (i.e., urban or rural), referral to  
10  
11 other providers (i.e., yes or no) were examined. Time spent with providers in primary  
12  
13 care setting was compared between patients with rare diseases and those without rare  
14  
15 diseases. Time spent with providers in primary care is the length of the time the provider  
16  
17 spent with the patient at the office and patient's waiting time to see the provider, receive  
18  
19 care from providers and prepare for a patient such as reviewing medical chart or  
20  
21 physical examination were excluded. (3)  
22  
23  
24

## 25 26 Statistical Analysis

27  
28 To account for the complex survey design used in the NAMCS, a weighted variable was  
29  
30 used to consider survey design effect. This allows for us to provide national estimates of  
31  
32 United States ambulatory health care visits to office-based physicians and community  
33  
34 health centers.(3) Also, it allows us to produce national estimates of the ambulatory  
35  
36 health care utilization in the US (3). The prevalence of rare disease seen in the primary  
37  
38 care office visit was estimated. Chi-square tests were used to compare characteristics  
39  
40 of PCPs who care for rare diseases against those who do not. Logistic regression was  
41  
42 also employed to examine the association between PCP referral to other providers and  
43  
44 patient diagnosis of a rare disease. All analyses were conducted in SAS version 9.4  
45  
46 (Cary, NC). This study was approved as exempt by the Institutional Review Board at the  
47  
48 University of Florida.  
49  
50  
51  
52

## 53 54 Patient and Public Involvement

55  
56  
57  
58  
59  
60

1  
2  
3 Patients and/or public were not involved in this study.  
4  
5

## 6 Results 7

8  
9 The final sample was 22,306 representing 354,507,772 office visits to PCPs in  
10 the US from 2012-2014. A total of 1,508 PCPs participated to submit data for sample  
11 patient visits. Of the total patient visits to a PCP, a rare disease was noted in 1.6% of  
12 those visits. PCPs cared for 177 different rare diseases. Patients with rare diseases  
13 were significantly older than those without rare diseases (age difference = 8.3 years,  
14  $p < .01$ ), while no significant differences were found in the distribution of sex and  
15 race/ethnicity (Table 1). The majority of patients with rare diseases were established  
16 patients (93.0%), having been seen by the PCP more than one time, and almost half  
17 (49.3%) were enrolled in private insurance programs. Of the visits for patients  
18 diagnosed with a rare disease, 39.0% visited their PCPs with a comorbid chronic  
19 problem. In addition, they had a higher total number of chronic diseases compared to  
20 patients without rare diseases (Table 1).  
21  
22  
23  
24  
25  
26  
27  
28  
29  
30  
31  
32  
33  
34  
35  
36  
37

38 Of visits by patients with rare disease, 14.3% were referred to other providers (Table 2).  
39  
40 While PCPs spent slightly more time with their patients who had rare diseases (22.4  
41 min), compared to patients without rare diseases (21.3 min), it was not significantly  
42 different (Table 2). The majority of visits for patients with rare diseases and more  
43 common diseases who were seen by PCPs were located in urban areas. PCPs  
44 practicing in rural areas (7.6%) were not significantly less likely than PCPs practicing in  
45 urban areas (16.8%;  $p = .06$ ) to refer patients with rare diseases to another physician. In  
46  
47  
48  
49  
50  
51  
52  
53  
54  
55  
56  
57  
58  
59  
60



1  
2  
3 a bivariate analysis, care for rare disease was also not associated with rurality ( $p=.32$ )  
4  
5 (Table 2).  
6  
7

8  
9 In an unadjusted regression model, patients with rare diseases were 69% more likely to  
10  
11 be referred to other providers than those without rare diseases. After controlling for  
12  
13 covariates, such as patients' characteristics (i.e., age, sex, race/ethnicity, types of  
14  
15 insurance, major reason for this visit, total number of chronic disease, having a rare  
16  
17 disease and established or new patient), patients with rare diseases were 52% more  
18  
19 likely to be referred to another provider than those without rare diseases (Table 3).  
20  
21  
22

## 23 Discussion

24  
25  
26 This study found that few patients with a rare disease were identified as being managed  
27  
28 in primary care practice. Patients with rare diseases in the primary care setting show  
29  
30 significantly older and have more comorbidities compared to those without a rare  
31  
32 disease diagnosis whereas patients with rare diseases are comparable to those without  
33  
34 rare diseases in terms of sex distribution, race/ethnicity and types of health insurance.  
35  
36 Not surprisingly, visits in primary care for patients diagnosed with rare diseases are  
37  
38 more likely than patients without rare diseases to lead to referral to another provider.  
39  
40 To our knowledge, this is the first study to investigate characteristics of patients with  
41  
42 rare diseases seen in primary care practice and the association between physician  
43  
44 referral and rare disease diagnosis.  
45  
46  
47  
48  
49

50  
51 Much of medical practice and the corresponding comfort in diagnosing and treating  
52  
53 conditions is affected by the frequency of occurrence of the condition and pattern  
54  
55 recognition. Rare diseases are by their very nature uncommon and thus PCPs may not  
56  
57  
58  
59  
60

1  
2  
3 always feel comfortable with the nuances of treatment and potential complications for a  
4 disease that they encounter very infrequently. According to the National Academy of  
5  
6  
7  
8  
9  
10  
11  
12  
13  
14  
15  
16  
17  
18  
19  
20  
21  
22  
23  
24  
25  
26  
27  
28  
29  
30  
31  
32  
33  
34  
35  
36  
37  
38  
39  
40  
41  
42  
43  
44  
45  
46  
47  
48  
49  
50  
51  
52  
53  
54  
55  
56  
57  
58  
59  
60

always feel comfortable with the nuances of treatment and potential complications for a disease that they encounter very infrequently. According to the National Academy of Medicine, since rare diseases tend to accompany multiple common conditions, it disrupts a clinician's ability to recognize clues of rare diseases.<sup>(8)</sup> In many of these cases PCPs need more than a consult from a specialist, especially when the primary care team does not have the specialized medical knowledge. Receiving all of their care from specialists may not be the best situation for the patient. Patients with rare diseases need to be managed in primary care or at least have shared care between primary care and specialists in complementary roles to provide a more effective management of these complex patients.

There are some limitations to this study. First, due to the design of the NAMCS we are limited to the actions recorded in that one visit. The design does allow us to have an understanding of the types of patients seen in primary care but it is not data on a cohort of patients. Thus, we do not know what sort of care may have transpired between the patient and the physician in previous visits. Also, it is not able to explore the linkage of multiple consultations with specialists pre- or post-visit to PCPs. Second, we are able to see if patients are referred in that one visit, we are unable to determine if that referral is for a consult or part of a shared care relationship between primary care and specialty care.

## Conclusion

This study identified characteristics of patients with rare diseases who are seen in primary care practice and the delivery patterns of PCPs managing patients with rare

1  
2  
3 diseases. Findings from this study suggest that PCPs must possess a broad scope of  
4  
5 practice in order to deliver comprehensive, high-quality care. A better understanding of  
6  
7 the overall management of patients with rare diseases managed solely outside of  
8  
9 primary care would help to improve the care for these patients.  
10  
11  
12  
13  
14  
15  
16  
17  
18  
19  
20  
21  
22  
23  
24  
25  
26  
27  
28  
29  
30  
31  
32  
33  
34  
35  
36  
37  
38  
39  
40  
41  
42  
43  
44  
45  
46  
47  
48  
49  
50  
51  
52  
53  
54  
55  
56  
57  
58  
59  
60

For peer review only

## Acknowledgements

### Contributors:

Ara Jo, PhD led the entire research as the first and corresponding author from writing the manuscript, analyzing the data and interpretation.

Samantha Larson, MPH, analyzed the data and contributed to writing the manuscript.

Peter J. Carek, MD, MS contributed to writing the manuscript.

Michael R. Peabody, PhD, contributed to writing the manuscript.

Lars E. Peterson, MD, PhD, contributed to writing the manuscript.

Arch G. Mainous III, PhD, contributed to writing the manuscript and guided the direction of the study.

Competing Interests Statement: Drs. Peterson and Peabody are employees of the American Board of Family Medicine. No other authors have no declaration of conflict of interests.

Funding Statement: This work was supported by a grant from the American Board of Family Medicine Foundation.

Ethics approval: This study was approved as exempt by the Institutional Review Board at the University of Florida.

1  
2  
3  
4  
5  
6  
7  
8  
9  
10  
11  
12  
13  
14  
15  
16  
17  
18  
19  
20  
21  
22  
23  
24  
25  
26  
27  
28  
29  
30  
31  
32  
33  
34  
35  
36  
37  
38  
39  
40  
41  
42  
43  
44  
45  
46  
47  
48  
49  
50  
51  
52  
53  
54  
55  
56  
57  
58  
59  
60

Data availability statement: Data are available through the National Ambulatory Medical  
Care Survey access from  
[https://www.cdc.gov/nchs/ahcd/datasets\\_documentation\\_related.htm](https://www.cdc.gov/nchs/ahcd/datasets_documentation_related.htm).

For peer review only

## References

1. Peabody MR, O'Neill TR, Stelter KL, Puffer JC. Frequency and Criticality of Diagnoses in Family Medicine Practices: From the National Ambulatory Medical Care Survey (NAMCS). *The Journal of the American Board of Family Medicine*. 2018;31(1):126-38.
2. GARD. FAQs About Rare Diseases: National Center for Advancing Translational Sciences; 11/30/2017 [Available from: <https://rarediseases.info.nih.gov/diseases/pages/31/faqs-about-rare-diseases>].
3. Phillips WR. Zebras on the commons: rare conditions in family practice. *The Journal of the American Board of Family Practice*. 2004;17(4):283-6.
4. NCHS. NAMCS Scope and Sample Design: Centers for Disease Control and Prevention; 11/6/2015 [Available from: [https://www.cdc.gov/nchs/ahcd/ahcd\\_scope.htm](https://www.cdc.gov/nchs/ahcd/ahcd_scope.htm)].
5. NHCS. 2014 NAMCS micro-data file documentation. Centers for Disease Control and Prevention; 2014.
6. NCHS. National Ambulatory Medical Care Survey 2018 Patient Record. Available from [https://www.cdc.gov/nchs/data/ahcd/2018\\_NAMCS\\_Patient\\_Record\\_Sample\\_Card.pdf](https://www.cdc.gov/nchs/data/ahcd/2018_NAMCS_Patient_Record_Sample_Card.pdf).

- 1  
2  
3 7. US Food & Drug Administration (FDA). Orphan Drug Act - Relevant Excerpts. August  
4  
5 2013 Available from  
6  
7 <https://www.fda.gov/forindustry/developingproductsforrareconditions/howto>  
8 <https://www.fda.gov/forindustry/developingproductsforrareconditions/howto>  
9 [applyfororphanproductdesignation/ucm364750.htm](https://www.fda.gov/forindustry/developingproductsforrareconditions/howto).  
10  
11  
12  
13  
14  
15  
16 8. Boat TF, Field MJ. Rare diseases and orphan products: Accelerating research and  
17 development: National Academies Press; 2011.  
18  
19  
20  
21  
22  
23  
24  
25  
26  
27  
28  
29  
30  
31  
32  
33  
34  
35  
36  
37  
38  
39  
40  
41  
42  
43  
44  
45  
46  
47  
48  
49  
50  
51  
52  
53  
54  
55  
56  
57  
58  
59  
60

Table 1. Characteristics of Patients with Rare Diseases in Primary Care, NAMCS 2012-2014 (unweighted N= 22,306, weighted N= 354,507,772)

|                                    | Patients with rare diseases (%) | Patients without rare diseases (%) | p-value |
|------------------------------------|---------------------------------|------------------------------------|---------|
| Unweighted Sample Size             | 363                             | 21,943                             |         |
| Weighted Sample Size               | 5,581,791                       | 348,925,981                        |         |
| Mean Age (year-old) **             | 47.7                            | 39.4                               | <0.001  |
| Sex                                |                                 |                                    |         |
| Female                             | 56.4                            | 53.8                               | 0.44    |
| Race                               |                                 |                                    |         |
| Non-Hispanic White                 | 75.0                            | 70.6                               | 0.54    |
| Non-Hispanic Black                 | 8.6                             | 10.1                               |         |
| Hispanics                          | 11.7                            | 14.3                               |         |
| Others                             | 4.7                             | 5.0                                |         |
| Insurance Types                    |                                 |                                    |         |
| Private Insurance                  | 49.3                            | 54.6                               | 0.15    |
| Public Insurance                   | 47.3                            | 40.0                               |         |
| Self-pay                           | 1.8                             | 3.5                                |         |
| Other                              | 1.5                             | 1.9                                |         |
| Major reasons for this visit**     |                                 |                                    |         |
| New Problems                       | 33.7                            | 42.6                               | 0.002   |
| Chronic Problems                   | 39.0                            | 28.7                               |         |
| Pre-/Post-Surgery                  | 27.3                            | 28.7                               |         |
| Preventive Care                    | 0.0                             | 0.0                                |         |
| Total Number of Chronic Diseases** | 1.3                             | 1.0                                | 0.001   |

\*\* statistical significant level at .05



Table 2. Practice Characteristics of Primary Care Physicians who Care for Patients with Rare Diseases using NAMCS, 2012-2014

|                                 | Patients with rare diseases | Patients without rare diseases | p-value |
|---------------------------------|-----------------------------|--------------------------------|---------|
| Practicing Area                 |                             |                                |         |
| Urban                           | 84.5                        | 86.4                           | 0.32    |
| Rural                           | 15.5                        | 13.6                           |         |
| Referral to Other Providers**   |                             |                                |         |
| Yes                             | 14.3                        | 9.0                            | 0.01    |
| No                              | 85.7                        | 91.0                           |         |
| Time Spent with Providers (min) | 22.4                        | 21.3                           | 0.09    |

\*\* statistical significant level at .05

Table 3. Odds Ratios of Referral Using Unadjusted and Adjusted Logistic Regression Analyses using NAMCS, 2012-2014

|                           | Unadjusted OR (95% CI) | Adjusted OR (95% CI) |
|---------------------------|------------------------|----------------------|
| Not having a rare disease | Reference              | Reference            |
| Having a rare disease     | 1.69 (1.15-2.48)**     | 1.52 (1.01-2.28)**   |

\*Controlled for age, gender, race/ethnicity, types of insurance, major reason for this visit, total number of chronic disease, having a rare disease and established vs. new patient.

\*\* statistical significant level at .05

For peer review only

## STROBE Statement—checklist of items that should be included in reports of observational studies

|                              | Item No | Recommendation                                                                                                                                                                                                                                                                                                                                                                                                                                                         | Page |
|------------------------------|---------|------------------------------------------------------------------------------------------------------------------------------------------------------------------------------------------------------------------------------------------------------------------------------------------------------------------------------------------------------------------------------------------------------------------------------------------------------------------------|------|
| <b>Title and abstract</b>    | 1       | (a) Indicate the study's design with a commonly used term in the title or the abstract                                                                                                                                                                                                                                                                                                                                                                                 | 1    |
|                              |         | (b) Provide in the abstract an informative and balanced summary of what was done and what was found                                                                                                                                                                                                                                                                                                                                                                    | 2-3  |
| <b>Introduction</b>          |         |                                                                                                                                                                                                                                                                                                                                                                                                                                                                        |      |
| Background/rationale         | 2       | Explain the scientific background and rationale for the investigation being reported                                                                                                                                                                                                                                                                                                                                                                                   | 4-5  |
| Objectives                   | 3       | State specific objectives, including any prespecified hypotheses                                                                                                                                                                                                                                                                                                                                                                                                       | 4-5  |
| <b>Methods</b>               |         |                                                                                                                                                                                                                                                                                                                                                                                                                                                                        |      |
| Study design                 | 4       | Present key elements of study design early in the paper                                                                                                                                                                                                                                                                                                                                                                                                                | 5    |
| Setting                      | 5       | Describe the setting, locations, and relevant dates, including periods of recruitment, exposure, follow-up, and data collection                                                                                                                                                                                                                                                                                                                                        | n/a  |
| Participants                 | 6       | (a) <i>Cohort study</i> —Give the eligibility criteria, and the sources and methods of selection of participants. Describe methods of follow-up<br><i>Case-control study</i> —Give the eligibility criteria, and the sources and methods of case ascertainment and control selection. Give the rationale for the choice of cases and controls<br><i>Cross-sectional study</i> —Give the eligibility criteria, and the sources and methods of selection of participants | 5    |
|                              |         | (b) <i>Cohort study</i> —For matched studies, give matching criteria and number of exposed and unexposed<br><i>Case-control study</i> —For matched studies, give matching criteria and the number of controls per case                                                                                                                                                                                                                                                 | n/a  |
| Variables                    | 7       | Clearly define all outcomes, exposures, predictors, potential confounders, and effect modifiers. Give diagnostic criteria, if applicable                                                                                                                                                                                                                                                                                                                               | 5-6  |
| Data sources/<br>measurement | 8*      | For each variable of interest, give sources of data and details of methods of assessment (measurement). Describe comparability of assessment methods if there is more than one group                                                                                                                                                                                                                                                                                   | 5-6  |
| Bias                         | 9       | Describe any efforts to address potential sources of bias                                                                                                                                                                                                                                                                                                                                                                                                              | n/a  |
| Study size                   | 10      | Explain how the study size was arrived at                                                                                                                                                                                                                                                                                                                                                                                                                              | 5    |
| Quantitative variables       | 11      | Explain how quantitative variables were handled in the analyses. If applicable, describe which groupings were chosen and why                                                                                                                                                                                                                                                                                                                                           | n/a  |
| Statistical methods          | 12      | (a) Describe all statistical methods, including those used to control for confounding                                                                                                                                                                                                                                                                                                                                                                                  | 6    |
|                              |         | (b) Describe any methods used to examine subgroups and interactions                                                                                                                                                                                                                                                                                                                                                                                                    | 6    |
|                              |         | (c) Explain how missing data were addressed                                                                                                                                                                                                                                                                                                                                                                                                                            | n/a  |
|                              |         | (d) <i>Cohort study</i> —If applicable, explain how loss to follow-up was addressed<br><i>Case-control study</i> —If applicable, explain how matching of cases and controls was addressed<br><i>Cross-sectional study</i> —If applicable, describe analytical methods taking account of sampling strategy                                                                                                                                                              | 5-6  |
|                              |         | (e) Describe any sensitivity analyses                                                                                                                                                                                                                                                                                                                                                                                                                                  |      |

| <b>Results</b>           |     |                                                                                                                                                                                                              | <b>Page</b> |
|--------------------------|-----|--------------------------------------------------------------------------------------------------------------------------------------------------------------------------------------------------------------|-------------|
| Participants             | 13* | (a) Report numbers of individuals at each stage of study—eg numbers potentially eligible, examined for eligibility, confirmed eligible, included in the study, completing follow-up, and analysed            | n/a         |
|                          |     | (b) Give reasons for non-participation at each stage                                                                                                                                                         | n/a         |
|                          |     | (c) Consider use of a flow diagram                                                                                                                                                                           | n/a         |
| Descriptive data         | 14* | (a) Give characteristics of study participants (eg demographic, clinical, social) and information on exposures and potential confounders                                                                     | 7           |
|                          |     | (b) Indicate number of participants with missing data for each variable of interest                                                                                                                          | n/a         |
|                          |     | (c) <i>Cohort study</i> —Summarise follow-up time (eg, average and total amount)                                                                                                                             | n/a         |
| Outcome data             | 15* | <i>Cohort study</i> —Report numbers of outcome events or summary measures over time                                                                                                                          | n/a         |
|                          |     | <i>Case-control study</i> —Report numbers in each exposure category, or summary measures of exposure                                                                                                         | n/a         |
|                          |     | <i>Cross-sectional study</i> —Report numbers of outcome events or summary measures                                                                                                                           | 7-8, 14     |
| Main results             | 16  | (a) Give unadjusted estimates and, if applicable, confounder-adjusted estimates and their precision (eg, 95% confidence interval). Make clear which confounders were adjusted for and why they were included | 7-8         |
|                          |     | (b) Report category boundaries when continuous variables were categorized                                                                                                                                    | n/a         |
|                          |     | (c) If relevant, consider translating estimates of relative risk into absolute risk for a meaningful time period                                                                                             | n/a         |
| Other analyses           | 17  | Report other analyses done—eg analyses of subgroups and interactions, and sensitivity analyses                                                                                                               | n/a         |
| <b>Discussion</b>        |     |                                                                                                                                                                                                              |             |
| Key results              | 18  | Summarise key results with reference to study objectives                                                                                                                                                     | 8           |
| Limitations              | 19  | Discuss limitations of the study, taking into account sources of potential bias or imprecision. Discuss both direction and magnitude of any potential bias                                                   | 9           |
| Interpretation           | 20  | Give a cautious overall interpretation of results considering objectives, limitations, multiplicity of analyses, results from similar studies, and other relevant evidence                                   | 8-9         |
| Generalisability         | 21  | Discuss the generalisability (external validity) of the study results                                                                                                                                        | 8           |
| <b>Other information</b> |     |                                                                                                                                                                                                              |             |
| Funding                  | 22  | Give the source of funding and the role of the funders for the present study and, if applicable, for the original study on which the present article is based                                                | 9           |

\*Give information separately for cases and controls in case-control studies and, if applicable, for exposed and unexposed groups in cohort and cross-sectional studies.

**Note:** An Explanation and Elaboration article discusses each checklist item and gives methodological background and published examples of transparent reporting. The STROBE checklist is best used in conjunction with this article (freely available on the Web sites of PLoS Medicine at <http://www.plosmedicine.org/>, Annals of Internal Medicine at <http://www.annals.org/>, and Epidemiology at <http://www.epidem.com/>). Information on the STROBE Initiative is available at [www.strobe-statement.org](http://www.strobe-statement.org).

# BMJ Open

## Prevalence and Practice for Rare diseases in Primary Care: a national cross-sectional study in the United States

|                                 |                                                                                                                                                                                                                                                                                                                                                                        |
|---------------------------------|------------------------------------------------------------------------------------------------------------------------------------------------------------------------------------------------------------------------------------------------------------------------------------------------------------------------------------------------------------------------|
| Journal:                        | <i>BMJ Open</i>                                                                                                                                                                                                                                                                                                                                                        |
| Manuscript ID                   | bmjopen-2018-027248.R3                                                                                                                                                                                                                                                                                                                                                 |
| Article Type:                   | Research                                                                                                                                                                                                                                                                                                                                                               |
| Date Submitted by the Author:   | 01-Mar-2019                                                                                                                                                                                                                                                                                                                                                            |
| Complete List of Authors:       | Jo, Ara; University of Florida, Health Services Research, Management and Policy;<br>Larson, Samantha; University of Florida<br>Carek, Peter; University of Florida<br>Peabody, Michael R; American Board of Family Medicine,<br>Peterson, Lars E.; Amer Board Family Med<br>Mainous III, Arch; University of Florida, Health Services Research, Management, and Policy |
| <b>Primary Subject Heading</b>: | General practice / Family practice                                                                                                                                                                                                                                                                                                                                     |
| Secondary Subject Heading:      | Health services research                                                                                                                                                                                                                                                                                                                                               |
| Keywords:                       | PRIMARY CARE, PREVENTIVE MEDICINE, Quality in health care < HEALTH SERVICES ADMINISTRATION & MANAGEMENT                                                                                                                                                                                                                                                                |
|                                 |                                                                                                                                                                                                                                                                                                                                                                        |

SCHOLARONE™  
Manuscripts

1  
2  
3 **Prevalence and Practice for Rare diseases in Primary Care: a national cross-**  
4 **sectional study in the United States**  
5  
6  
7

8 Ara Jo, PhD <sup>1</sup>, Samantha Larson, MPH <sup>1</sup>, Peter J. Carek, MD, MS <sup>2</sup>, Michael R.  
9 Peabody, PhD <sup>3</sup>, Lars E. Peterson, MD, PhD <sup>3,4</sup>, Arch G. Mainous III, PhD <sup>1,2</sup>  
10  
11

12 1. Department of Health Services Research, Management and Policy, University of  
13 Florida  
14

15 2. Department of Community Health and Family Medicine, University of Florida  
16

17 3. The American Board of Family Medicine, Lexington, KY  
18

19 4. Department of Family and Community Medicine, University of Kentucky  
20  
21  
22  
23

24 Corresponding Author:  
25

26 Ara Jo, PhD  
27

28 Department of Health Services Research, Management and Policy  
29

30 University of Florida  
31

32 Health Sciences Center, PO Box 100195  
33

34 Gainesville, FL 32610 USA  
35

36 Phone: 352-273-6539  
37

38 Fax: 352-273-6075  
39

40 [ara13j@ufl.edu](mailto:ara13j@ufl.edu)  
41  
42

43 Word count of the abstract: 289  
44

45 Word count of the text: 1,907  
46  
47

48 Tables: 3  
49

50 **Keywords:** Rare disease, primary care, scope of practice  
51  
52  
53  
54  
55  
56  
57  
58  
59  
60

## Abstract

**Objectives:** There are more than 7,000 rare diseases in the US and they are prevalent in 8% of the population. Due to life-threatening risk and limited therapies, early detection and treatment are critical. The purpose of this study was to explore characteristics of visits for patients with rare diseases seen by primary care physicians (PCPs).

**Design:** The study used a cross sectional study using a national representative dataset, the National Ambulatory Medical Care Survey for the years 2012-2014.

**Setting:** Primary care setting

**Participants:** Visits to PCPs (n= 22,306 representing 354,507,772 office visits to PCPs).

**Primary Outcome Measures:** Prevalence of rare diseases in visits of PCPs was the primary outcome. Bivariate analyses and logistic regression analyses were used to compare patients with rare diseases and those without rare diseases and examined characteristics of PCP visits for rare diseases and practice pattern.

**Results:** Among outpatient visits to PCPs, rare diseases account for 1.6% of the visits. The majority of patients with rare diseases were established patients (93.0%) and almost half (49.0%) were enrolled in public insurance programs. The time spent in visits for rare diseases (22.4 minutes) and visits for more common diseases (21.3 minutes) was not significantly different (p=.09). In an adjusted model controlling for patient characteristics (age, sex, types of insurance, reason for this visit, total number of chronic disease, having a rare disease and established or new patient), patients with

1  
2  
3 rare diseases were 52% more likely to be referred to another provider (OR 1.52, 95%  
4  
5 CI, 1.01-2.28).  
6  
7

8 **Conclusions:** Visits for rare diseases are uncommon in primary care practice. Future  
9  
10 research may help to explain whether this low level of management of rare diseases in  
11  
12 primary care practice is consistent with a goal of a broad scope of care.  
13  
14  
15

### 16 17 18 19 **Strengths and limitations of this study** 20 21

- 22 • This study is the first research to investigate characteristics of patients with rare  
23 diseases seen in primary care practice and the association between physician  
24 referral and rare disease diagnosis.  
25  
26
- 27 • The study used population-based national representative data allowing for  
28 generalizability.  
29  
30
- 31 • Primary care physicians may play a vital role in providing continuous care and  
32 managing patients with rare diseases effectively.  
33  
34
- 35 • The study is limited to the actions recorded in one visit due to study design.  
36  
37
- 38 • The study was unable to determine if that referral is for a consult or part of a  
39 shared care relationship between primary care and specialty care  
40  
41  
42  
43  
44  
45  
46  
47  
48  
49  
50  
51  
52  
53  
54  
55  
56  
57  
58  
59  
60



## Introduction

Primary Care Physicians (PCPs) are trained to provide care for a broad scope of conditions within their patient population. When PCPs maintain a broad scope of practice this safeguards access and quality of care for the general population. Some of these conditions are managed directly by the PCP and with others the PCP coordinates the care for the patient. One recent study indicated that in one year, family physicians typically manage about 1,700 diagnoses in office visits, with 100 diagnoses managed frequently.(1)

In addition to common, high prevalence diseases like diabetes, hypertension and arthritis, a substantial proportion of the general patient population, has a rare disease, or diseases. As of 2017, the National Institute of Health (NIH) Genetic and Rare Disease Information Center (GARD) had identified 7,000 rare diseases, affecting approximately 25-30 million people in the US population. (2) Rare diseases are categorized as life-threatening, with only few limited effective therapies available. In addition to the emotional and physical burden associated with diagnosis, patients with a rare disease often face financial burden due to the significant cost associated with drugs and therapies. As such, early detection and treatment are critical. For example, in one study, more than half of patients with rare diseases being seen at a PCP practice had been diagnosed with rare diseases at a PCP practice.(3)

However, to date there have been few studies investigating the role of PCPs in the management of patients with rare diseases. The purpose of this study was to

1  
2  
3 examine in a nationally representative sample of visits, the prevalence of rare diseases  
4  
5 cared for in primary care practice as well as characteristics of patients and providers.  
6  
7

## 8 **Methods**

9

10  
11 This study used the National Ambulatory Medical Care Survey (NAMCS), a national  
12  
13 representative dataset, for the years 2012-2014. The NAMCS is a national probability  
14  
15 sample survey of ambulatory medical care visits to office-based physicians that allows  
16  
17 for national estimates regarding medical care in the US. (3) Nonfederally employed  
18  
19 physicians defined by the American Medical Association and the American Osteopathic  
20  
21 Association who were principally engaged in patient care activities and who are not  
22  
23 specialized in anesthesiology, pathology and radiology were eligible. Also physicians  
24  
25 who are younger than 85 years of age at the time of the survey were eligible. Based on  
26  
27 multistage probability design, eligible PCPs were selected and informed about the  
28  
29 survey and those who agreed to participate to the survey were included in the data. (3)  
30  
31 NAMCS data is collected annually by the National Center for Health Statistics (NCHS).  
32  
33 It is electronic record collected by the Census Bureau in the US and multiple steps were  
34  
35 implemented to process and review the data based on the NCHS protocol. The data  
36  
37 estimates to be reliable met two criteria, 1) sample records should be at least 30, and 2)  
38  
39 a relative standard error should be 30 percent or less. (3) The sample frame for NAMCS  
40  
41 data in the years 2012-2014 was composed of PCPs who specialize in primary care  
42  
43 (e.g., General and Family Practice, Internal medicine and Pediatrics), and who identified  
44  
45 themselves as the primary care physician (PCP) of the patient.(4) This list conforms to  
46  
47 the definition used by the NAMCS to categorize primary care. Diagnosis was  
48  
49 determined based upon the ICD-9 codes and the diagnosis made by a PCP at a visit  
50  
51  
52  
53  
54  
55  
56  
57

1  
2  
3 was electronically recorded in the patient record form. The patient report form provided  
4 preexisting conditions, current diagnosis and new diagnosis. (5) Thus, more than 30  
5  
6 diagnoses can be managed via this report form. (6) Furthermore, this report form allows  
7  
8 us to identify established patients who have visited before whereas it does not allow us  
9  
10 to estimate numbers of previous visits. The unweighted sample size was 22,306  
11  
12 representing 354,507,772 office visits to PCPs in the US from 2012-2014.  
13  
14  
15

### 16 17 18 Rare disease

19  
20 A rare disease is defined as a disease or a disorder that affects fewer than 200,000  
21  
22 people in the US.(2, 7) For this study, diagnoses were identified as a rare disease using  
23  
24 the list provided by the GARD Information Center.(2) Two independent researchers and  
25  
26 (i.e., Dr. Jo and Larson) and one family medicine physician (i.e., Dr. Carek) reviewed all  
27  
28 new diagnosis in designated study years and identified rare diseases by comparing the  
29  
30 list of GARD. With consensus agreements, rare diseases for the study were  
31  
32 determined.  
33  
34  
35

### 36 37 Independent Variables

38  
39 Demographics of patients seen by PCPs, such as age, gender and race/ethnicity, were  
40  
41 used. Gender and race/ethnicity (i.e., Non-Hispanic White, Non-Hispanic Black,  
42  
43 Hispanics and Others) were considered categorical variables whereas age was used as  
44  
45 a continuous variable. In addition, their form of health insurance, major reason for the  
46  
47 visit, and total number of diagnosed chronic diseases were included as categorical  
48  
49 variables. Health insurance was stratified into four categories: private insurance, public  
50  
51 insurance such as Medicaid and Medicare, self-pay, and others. Major reason for the  
52  
53  
54  
55  
56  
57  
58  
59  
60

1  
2  
3 visit was also categorized into four groups: new problems, chronic problems, pre- or  
4  
5 post-surgery care and preventive care.  
6  
7

8  
9 Providers' characteristics including practice location (i.e., urban or rural), referral to  
10  
11 other providers (i.e., yes or no) were examined. Time spent with providers in primary  
12  
13 care setting was compared between patients with rare diseases and those without rare  
14  
15 diseases. Time spent with providers in primary care is the length of the time the provider  
16  
17 spent with the patient at the office and patient's waiting time to see the provider, receive  
18  
19 care from providers and prepare for a patient such as reviewing medical chart or  
20  
21 physical examination were excluded. (3)  
22  
23  
24

## 25 26 Statistical Analysis

27  
28 To account for the complex survey design used in the NAMCS, a weighted variable was  
29  
30 used to consider survey design effect. This allows for us to provide national estimates of  
31  
32 United States ambulatory health care visits to office-based physicians and community  
33  
34 health centers.(3) Also, it allows us to produce national estimates of the ambulatory  
35  
36 health care utilization in the US (3). The prevalence of rare disease seen in the primary  
37  
38 care office visit was estimated. Chi-square tests were used to compare characteristics  
39  
40 of PCPs who care for rare diseases against those who do not. Logistic regression was  
41  
42 also employed to examine the association between PCP referral to other providers and  
43  
44 patient diagnosis of a rare disease. All analyses were conducted in SAS version 9.4  
45  
46 (Cary, NC). This study was approved as exempt by the Institutional Review Board at the  
47  
48 University of Florida.  
49  
50  
51  
52

## 53 54 Patient and Public Involvement

55  
56  
57  
58  
59  
60

1  
2  
3 Patients and/or public were not involved in this study.  
4  
5

## 6 Results 7

8  
9 The final sample was 22,306 representing 354,507,772 office visits to PCPs in  
10 the US from 2012-2014. A total of 1,508 PCPs participated to submit data for sample  
11 patient visits. Of the total patient visits to a PCP, a rare disease was noted in 1.6% of  
12 those visits. PCPs cared for 177 different rare diseases. Patients with rare diseases  
13 were significantly older than those without rare diseases (age difference = 8.3 years,  
14  $p < .01$ ), while no significant differences were found in the distribution of sex and  
15 race/ethnicity (Table 1). The majority of patients with rare diseases were established  
16 patients (93.0%), having been seen by the PCP more than one time, and almost half  
17 (49.3%) were enrolled in private insurance programs. Of the visits for patients  
18 diagnosed with a rare disease, 39.0% visited their PCPs with a comorbid chronic  
19 problem. In addition, they had a higher total number of chronic diseases compared to  
20 patients without rare diseases (Table 1).  
21  
22  
23  
24  
25  
26  
27  
28  
29  
30  
31  
32  
33  
34  
35  
36  
37

38 Of visits by patients with rare disease, 14.3% were referred to other providers (Table 2).  
39  
40 While PCPs spent slightly more time with their patients who had rare diseases (22.4  
41 min), compared to patients without rare diseases (21.3 min), it was not significantly  
42 different (Table 2). The majority of visits for patients with rare diseases and more  
43 common diseases who were seen by PCPs were located in urban areas. PCPs  
44 practicing in rural areas (7.6%) were not significantly less likely than PCPs practicing in  
45 urban areas (16.8%;  $p = .06$ ) to refer patients with rare diseases to another physician. In  
46  
47  
48  
49  
50  
51  
52  
53  
54  
55  
56  
57  
58  
59  
60

1  
2  
3 a bivariate analysis, care for rare disease was also not associated with rurality ( $p=.32$ )  
4  
5 (Table 2).  
6  
7

8  
9 In an unadjusted regression model, patients with rare diseases were 69% more likely to  
10  
11 be referred to other providers than those without rare diseases. After controlling for  
12  
13 covariates, such as patients' characteristics (i.e., age, sex, race/ethnicity, types of  
14  
15 insurance, major reason for this visit, total number of chronic disease, having a rare  
16  
17 disease and established or new patient), patients with rare diseases were 52% more  
18  
19 likely to be referred to another provider than those without rare diseases (Table 3).  
20  
21  
22

## 23 Discussion

24  
25  
26 This study found that few patients with a rare disease were identified as being managed  
27  
28 in primary care practice. Patients with rare diseases in the primary care setting show  
29  
30 significantly older and have more comorbidities compared to those without a rare  
31  
32 disease diagnosis whereas patients with rare diseases are comparable to those without  
33  
34 rare diseases in terms of sex distribution, race/ethnicity and types of health insurance.  
35  
36 Not surprisingly, visits in primary care for patients diagnosed with rare diseases are  
37  
38 more likely than patients without rare diseases to lead to referral to another provider.  
39  
40 To our knowledge, this is the first study to investigate characteristics of patients with  
41  
42 rare diseases seen in primary care practice and the association between physician  
43  
44 referral and rare disease diagnosis.  
45  
46  
47  
48  
49

50  
51 Much of medical practice and the corresponding comfort in diagnosing and treating  
52  
53 conditions is affected by the frequency of occurrence of the condition and pattern  
54  
55 recognition. Rare diseases are by their very nature uncommon and thus PCPs may not  
56  
57  
58  
59  
60

1  
2  
3 always feel comfortable with the nuances of treatment and potential complications for a  
4 disease that they encounter very infrequently. According to the National Academy of  
5 Medicine, since rare diseases tend to accompany multiple common conditions, it  
6 disrupts a clinician's ability to recognize clues of rare diseases.(8) In many of these  
7 cases PCPs need more than a consult from a specialist, especially when the primary  
8 care team does not have the specialized medical knowledge. Receiving all of their care  
9 from specialists may not be the best situation for the patient. Patients with rare diseases  
10 need to be managed in primary care or at least have shared care between primary care  
11 and specialists in complementary roles to provide a more effective management of  
12 these complex patients.  
13  
14  
15  
16  
17  
18  
19  
20  
21  
22  
23  
24  
25  
26

27 There are some limitations to this study. First, due to the design of the NAMCS we are  
28 limited to the actions recorded in that one visit. The design does allow us to have an  
29 understanding of the types of patients seen in primary care but it is not data on a cohort  
30 of patients. Thus, we do not know what sort of care may have transpired between the  
31 patient and the physician in previous visits. Also, it is not able to explore the linkage of  
32 multiple consultations with specialists pre- or post-visit to PCPs. Second, we are able to  
33 see if patients are referred in that one visit, we are unable to determine if that referral is  
34 for a consult or part of a shared care relationship between primary care and specialty  
35 care.  
36  
37  
38  
39  
40  
41  
42  
43  
44  
45  
46  
47

## 48 Conclusion

49  
50  
51 This study identified characteristics of patients with rare diseases who are seen in  
52 primary care practice and the delivery patterns of PCPs managing patients with rare  
53  
54  
55  
56  
57

1  
2  
3 diseases. Findings from this study suggest that PCPs must possess a broad scope of  
4  
5 practice in order to deliver comprehensive, high-quality care. A better understanding of  
6  
7 the overall management of patients with rare diseases managed solely outside of  
8  
9 primary care would help to improve the care for these patients.  
10  
11  
12  
13  
14  
15  
16  
17  
18  
19  
20  
21  
22  
23  
24  
25  
26  
27  
28  
29  
30  
31  
32  
33  
34  
35  
36  
37  
38  
39  
40  
41  
42  
43  
44  
45  
46  
47  
48  
49  
50  
51  
52  
53  
54  
55  
56  
57  
58  
59  
60

For peer review only



## Acknowledgements

### Contributors:

Ara Jo, PhD led the entire research as the first and corresponding author from writing the manuscript, analyzing the data and interpretation.

Samantha Larson, MPH, analyzed the data and contributed to writing the manuscript.

Peter J. Carek, MD, MS contributed to writing the manuscript.

Michael R. Peabody, PhD, contributed to writing the manuscript.

Lars E. Peterson, MD, PhD, contributed to writing the manuscript.

Arch G. Mainous III, PhD, contributed to writing the manuscript and guided the direction of the study.

Competing Interests Statement: Drs. Peterson and Peabody are employees of the American Board of Family Medicine. No other authors have no declaration of conflict of interests.

Funding Statement: This work was supported by a grant from the American Board of Family Medicine Foundation.

Ethics approval: This study was approved as exempt by the Institutional Review Board at the University of Florida.

1  
2  
3  
4  
5  
6  
7  
8  
9  
10  
11  
12  
13  
14  
15  
16  
17  
18  
19  
20  
21  
22  
23  
24  
25  
26  
27  
28  
29  
30  
31  
32  
33  
34  
35  
36  
37  
38  
39  
40  
41  
42  
43  
44  
45  
46  
47  
48  
49  
50  
51  
52  
53  
54  
55  
56  
57  
58  
59  
60

Data availability statement: Data are available through the National Ambulatory Medical  
Care Survey access from  
[https://www.cdc.gov/nchs/ahcd/datasets\\_documentation\\_related.htm](https://www.cdc.gov/nchs/ahcd/datasets_documentation_related.htm).

For peer review only

## References

1. Peabody MR, O'Neill TR, Stelter KL, Puffer JC. Frequency and Criticality of Diagnoses in Family Medicine Practices: From the National Ambulatory Medical Care Survey (NAMCS). *The Journal of the American Board of Family Medicine*. 2018;31(1):126-38.
2. GARD. FAQs About Rare Diseases: National Center for Advancing Translational Sciences; 11/30/2017 [Available from: <https://rarediseases.info.nih.gov/diseases/pages/31/faqs-about-rare-diseases>].
3. Phillips WR. Zebras on the commons: rare conditions in family practice. *The Journal of the American Board of Family Practice*. 2004;17(4):283-6.
4. NCHS. NAMCS Scope and Sample Design: Centers for Disease Control and Prevention; 11/6/2015 [Available from: [https://www.cdc.gov/nchs/ahcd/ahcd\\_scope.htm](https://www.cdc.gov/nchs/ahcd/ahcd_scope.htm)].
5. NHCS. 2014 NAMCS micro-data file documentation. Centers for Disease Control and Prevention; 2014.
6. NCHS. National Ambulatory Medical Care Survey 2018 Patient Record. Available from [https://www.cdc.gov/nchs/data/ahcd/2018\\_NAMCS\\_Patient\\_Record\\_Sample\\_Card.pdf](https://www.cdc.gov/nchs/data/ahcd/2018_NAMCS_Patient_Record_Sample_Card.pdf).

- 1  
2  
3 7. US Food & Drug Administration (FDA). Orphan Drug Act - Relevant Excerpts. August  
4  
5 2013 Available from  
6  
7 <https://www.fda.gov/forindustry/developingproductsforrareconditions/howto>  
8 <https://www.fda.gov/forindustry/developingproductsforrareconditions/howto>  
9 [applyfororphanproductdesignation/ucm364750.htm](https://www.fda.gov/forindustry/developingproductsforrareconditions/howto).  
10  
11  
12  
13  
14  
15  
16 8. Boat TF, Field MJ. Rare diseases and orphan products: Accelerating research and  
17 development: National Academies Press; 2011.  
18  
19  
20  
21  
22  
23  
24  
25  
26  
27  
28  
29  
30  
31  
32  
33  
34  
35  
36  
37  
38  
39  
40  
41  
42  
43  
44  
45  
46  
47  
48  
49  
50  
51  
52  
53  
54  
55  
56  
57  
58  
59  
60

Table 1. Characteristics of Patients with Rare Diseases in Primary Care, NAMCS 2012-2014 (unweighted N= 22,306, weighted N= 354,507,772)

|                                    | Patients with rare diseases (%) | Patients without rare diseases (%) | p-value |
|------------------------------------|---------------------------------|------------------------------------|---------|
| Unweighted Sample Size             | 363                             | 21,943                             |         |
| Weighted Sample Size               | 5,581,791                       | 348,925,981                        |         |
| Mean Age (year-old) **             | 47.7                            | 39.4                               | <0.001  |
| Sex                                |                                 |                                    |         |
| Female                             | 56.4                            | 53.8                               | 0.44    |
| Race                               |                                 |                                    |         |
| Non-Hispanic White                 | 75.0                            | 70.6                               | 0.54    |
| Non-Hispanic Black                 | 8.6                             | 10.1                               |         |
| Hispanics                          | 11.7                            | 14.3                               |         |
| Others                             | 4.7                             | 5.0                                |         |
| Insurance Types                    |                                 |                                    |         |
| Private Insurance                  | 49.3                            | 54.6                               | 0.15    |
| Public Insurance                   | 47.3                            | 40.0                               |         |
| Self-pay                           | 1.8                             | 3.5                                |         |
| Other                              | 1.5                             | 1.9                                |         |
| Major reasons for this visit**     |                                 |                                    |         |
| New Problems                       | 33.7                            | 42.6                               | 0.002   |
| Chronic Problems                   | 39.0                            | 28.7                               |         |
| Pre-/Post-Surgery                  | 27.3                            | 28.7                               |         |
| Preventive Care                    | 0.0                             | 0.0                                |         |
| Total Number of Chronic Diseases** | 1.3                             | 1.0                                | 0.001   |

\*\* statistical significant level at .05

Table 2. Practice Characteristics of Primary Care Physicians who Care for Patients with Rare Diseases using NAMCS, 2012-2014

|                                 | Patients with rare diseases | Patients without rare diseases | p-value |
|---------------------------------|-----------------------------|--------------------------------|---------|
| Practicing Area                 |                             |                                |         |
| Urban                           | 84.5                        | 86.4                           | 0.32    |
| Rural                           | 15.5                        | 13.6                           |         |
| Referral to Other Providers**   |                             |                                |         |
| Yes                             | 14.3                        | 9.0                            | 0.01    |
| No                              | 85.7                        | 91.0                           |         |
| Time Spent with Providers (min) | 22.4                        | 21.3                           | 0.09    |

\*\* statistical significant level at .05

Table 3. Odds Ratios of Referral Using Unadjusted and Adjusted Logistic Regression Analyses using NAMCS, 2012-2014

|                           | Unadjusted OR (95% CI) | Adjusted OR (95% CI) |
|---------------------------|------------------------|----------------------|
| Not having a rare disease | Reference              | Reference            |
| Having a rare disease     | 1.69 (1.15-2.48)**     | 1.52 (1.01-2.28)**   |

\*Controlled for age, gender, race/ethnicity, types of insurance, major reason for this visit, total number of chronic disease, having a rare disease and established vs. new patient.

\*\* statistical significant level at .05

For peer review only

## STROBE Statement—checklist of items that should be included in reports of observational studies

|                           | Item No | Recommendation                                                                                                                                                                                                                                                                                                                                                                                                                                                         | Page |
|---------------------------|---------|------------------------------------------------------------------------------------------------------------------------------------------------------------------------------------------------------------------------------------------------------------------------------------------------------------------------------------------------------------------------------------------------------------------------------------------------------------------------|------|
| <b>Title and abstract</b> | 1       | (a) Indicate the study's design with a commonly used term in the title or the abstract                                                                                                                                                                                                                                                                                                                                                                                 | 1    |
|                           |         | (b) Provide in the abstract an informative and balanced summary of what was done and what was found                                                                                                                                                                                                                                                                                                                                                                    | 2-3  |
| <b>Introduction</b>       |         |                                                                                                                                                                                                                                                                                                                                                                                                                                                                        |      |
| Background/rationale      | 2       | Explain the scientific background and rationale for the investigation being reported                                                                                                                                                                                                                                                                                                                                                                                   | 4-5  |
| Objectives                | 3       | State specific objectives, including any prespecified hypotheses                                                                                                                                                                                                                                                                                                                                                                                                       | 4-5  |
| <b>Methods</b>            |         |                                                                                                                                                                                                                                                                                                                                                                                                                                                                        |      |
| Study design              | 4       | Present key elements of study design early in the paper                                                                                                                                                                                                                                                                                                                                                                                                                | 5    |
| Setting                   | 5       | Describe the setting, locations, and relevant dates, including periods of recruitment, exposure, follow-up, and data collection                                                                                                                                                                                                                                                                                                                                        | n/a  |
| Participants              | 6       | (a) <i>Cohort study</i> —Give the eligibility criteria, and the sources and methods of selection of participants. Describe methods of follow-up<br><i>Case-control study</i> —Give the eligibility criteria, and the sources and methods of case ascertainment and control selection. Give the rationale for the choice of cases and controls<br><i>Cross-sectional study</i> —Give the eligibility criteria, and the sources and methods of selection of participants | 5    |
|                           |         | (b) <i>Cohort study</i> —For matched studies, give matching criteria and number of exposed and unexposed<br><i>Case-control study</i> —For matched studies, give matching criteria and the number of controls per case                                                                                                                                                                                                                                                 | n/a  |
| Variables                 | 7       | Clearly define all outcomes, exposures, predictors, potential confounders, and effect modifiers. Give diagnostic criteria, if applicable                                                                                                                                                                                                                                                                                                                               | 5-6  |
| Data sources/measurement  | 8*      | For each variable of interest, give sources of data and details of methods of assessment (measurement). Describe comparability of assessment methods if there is more than one group                                                                                                                                                                                                                                                                                   | 5-6  |
| Bias                      | 9       | Describe any efforts to address potential sources of bias                                                                                                                                                                                                                                                                                                                                                                                                              | n/a  |
| Study size                | 10      | Explain how the study size was arrived at                                                                                                                                                                                                                                                                                                                                                                                                                              | 5    |
| Quantitative variables    | 11      | Explain how quantitative variables were handled in the analyses. If applicable, describe which groupings were chosen and why                                                                                                                                                                                                                                                                                                                                           | n/a  |
| Statistical methods       | 12      | (a) Describe all statistical methods, including those used to control for confounding                                                                                                                                                                                                                                                                                                                                                                                  | 6    |
|                           |         | (b) Describe any methods used to examine subgroups and interactions                                                                                                                                                                                                                                                                                                                                                                                                    | 6    |
|                           |         | (c) Explain how missing data were addressed                                                                                                                                                                                                                                                                                                                                                                                                                            | n/a  |
|                           |         | (d) <i>Cohort study</i> —If applicable, explain how loss to follow-up was addressed<br><i>Case-control study</i> —If applicable, explain how matching of cases and controls was addressed<br><i>Cross-sectional study</i> —If applicable, describe analytical methods taking account of sampling strategy                                                                                                                                                              | 5-6  |
|                           |         | (e) Describe any sensitivity analyses                                                                                                                                                                                                                                                                                                                                                                                                                                  |      |



| <b>Results</b>           |     |                                                                                                                                                                                                              | <b>Page</b> |
|--------------------------|-----|--------------------------------------------------------------------------------------------------------------------------------------------------------------------------------------------------------------|-------------|
| Participants             | 13* | (a) Report numbers of individuals at each stage of study—eg numbers potentially eligible, examined for eligibility, confirmed eligible, included in the study, completing follow-up, and analysed            | n/a         |
|                          |     | (b) Give reasons for non-participation at each stage                                                                                                                                                         | n/a         |
|                          |     | (c) Consider use of a flow diagram                                                                                                                                                                           | n/a         |
| Descriptive data         | 14* | (a) Give characteristics of study participants (eg demographic, clinical, social) and information on exposures and potential confounders                                                                     | 7           |
|                          |     | (b) Indicate number of participants with missing data for each variable of interest                                                                                                                          | n/a         |
|                          |     | (c) <i>Cohort study</i> —Summarise follow-up time (eg, average and total amount)                                                                                                                             | n/a         |
| Outcome data             | 15* | <i>Cohort study</i> —Report numbers of outcome events or summary measures over time                                                                                                                          | n/a         |
|                          |     | <i>Case-control study</i> —Report numbers in each exposure category, or summary measures of exposure                                                                                                         | n/a         |
|                          |     | <i>Cross-sectional study</i> —Report numbers of outcome events or summary measures                                                                                                                           | 7-8, 14     |
| Main results             | 16  | (a) Give unadjusted estimates and, if applicable, confounder-adjusted estimates and their precision (eg, 95% confidence interval). Make clear which confounders were adjusted for and why they were included | 7-8         |
|                          |     | (b) Report category boundaries when continuous variables were categorized                                                                                                                                    | n/a         |
|                          |     | (c) If relevant, consider translating estimates of relative risk into absolute risk for a meaningful time period                                                                                             | n/a         |
| Other analyses           | 17  | Report other analyses done—eg analyses of subgroups and interactions, and sensitivity analyses                                                                                                               | n/a         |
| <b>Discussion</b>        |     |                                                                                                                                                                                                              |             |
| Key results              | 18  | Summarise key results with reference to study objectives                                                                                                                                                     | 8           |
| Limitations              | 19  | Discuss limitations of the study, taking into account sources of potential bias or imprecision. Discuss both direction and magnitude of any potential bias                                                   | 9           |
| Interpretation           | 20  | Give a cautious overall interpretation of results considering objectives, limitations, multiplicity of analyses, results from similar studies, and other relevant evidence                                   | 8-9         |
| Generalisability         | 21  | Discuss the generalisability (external validity) of the study results                                                                                                                                        | 8           |
| <b>Other information</b> |     |                                                                                                                                                                                                              |             |
| Funding                  | 22  | Give the source of funding and the role of the funders for the present study and, if applicable, for the original study on which the present article is based                                                | 9           |

\*Give information separately for cases and controls in case-control studies and, if applicable, for exposed and unexposed groups in cohort and cross-sectional studies.

**Note:** An Explanation and Elaboration article discusses each checklist item and gives methodological background and published examples of transparent reporting. The STROBE checklist is best used in conjunction with this article (freely available on the Web sites of PLoS Medicine at <http://www.plosmedicine.org/>, Annals of Internal Medicine at <http://www.annals.org/>, and Epidemiology at <http://www.epidem.com/>). Information on the STROBE Initiative is available at [www.strobe-statement.org](http://www.strobe-statement.org).
